# Supplementary material for: Low-abundance mutations in colorectal cancer patients and healthy adults
Source: publisher site journal article supplement (doi:10.18632/aging.102657), 2020-01-12
Supplement: Supplementary file [file aging-v12i1-102657-supplementary-material-SD2.pdf]

## SUPPLEMENTARY TABLES

**Supplementary Table 1.**

| No.       | Sex    | Age | Tumor size    | Stage | Lymph.Nodes.Positive | CT detection |
|-----------|--------|-----|---------------|-------|----------------------|--------------|
| 201702011 | female | 65  | 1.5*1.5*0.5cm | III   | 1                    | 1            |
| 201705053 | male   | 52  | 4.5*4.5*0.5cm | IV    | 0                    | 1            |
| 201701065 | male   | 66  | 4.5*4.5*1.0cm | IV    | 0                    | 1            |
| 201802060 | male   | 73  | 1.5*1.0*0.5cm | I     | 0                    | 1            |
| 201804011 | male   | 62  | 5.0*4.0*3.0cm | II    | 0                    | 1            |
| 201806006 | male   | 81  | 4.0*1.0*0.8cm | II    | 0                    | 1            |
| 201902005 | male   | 64  | 6.5*3.5*1.5cm | III   | 0                    | 1            |

Please browse Full Text version to see the data of Supplementary Table 2

**Supplementary Table 2.**

**Supplementary Table 3.**

| Patients  | sample | raw reads | raw data (bp) | Q30(%) | clean reads | clean data (bp) |
|-----------|--------|-----------|---------------|--------|-------------|-----------------|
| Health 1  | blood  | 2874958   | 431243700     | 98.60% | 2834786     | 425217900       |
| Health 2  | blood  | 3555754   | 533363100     | 98.65% | 3507699     | 526154850       |
| Health 3  | blood  | 3791302   | 568695300     | 98.55% | 3736490     | 560473500       |
| Health 4  | blood  | 3465252   | 519787800     | 98.60% | 3416689     | 512503350       |
| Health 5  | blood  | 2733798   | 410069700     | 98.66% | 2697123     | 404568450       |
| Health 6  | blood  | 2374414   | 356162100     | 98.35% | 2335284     | 350292600       |
| Health 7  | blood  | 2597040   | 389556000     | 98.51% | 2558332     | 383749800       |
| Patient 1 | T1     | 8983730   | 1347559500    | 94.44% | 8484669     | 1272700350      |
| Patient 1 | T21    | 3889436   | 583415400     | 94.61% | 3679665     | 551949750       |
| Patient 1 | T22    | 6487360   | 973104000     | 95.23% | 6177609     | 926641350       |
| Patient 1 | T31    | 5021792   | 753268800     | 95.15% | 4778485     | 716772750       |
| Patient 1 | T32    | 5293576   | 794036400     | 95.10% | 5034356     | 755153400       |
| Patient 1 | T33    | 7208058   | 1081208700    | 95.47% | 6881547     | 1032232050      |
| Patient 1 | normal | 10611972  | 1591795800    | 95.14% | 10096302    | 1514445300      |
| Patient 2 | T1     | 12907630  | 1936144500    | 94.81% | 12237581    | 1835637150      |
| Patient 2 | T21    | 643660    | 96549000      | 95.38% | 613951      | 92092650        |
| Patient 2 | T22    | 6291702   | 943755300     | 94.59% | 5951473     | 892720950       |
| Patient 2 | T31    | 5938210   | 890731500     | 95.01% | 5641969     | 846295350       |
| Patient 2 | T32    | 12856498  | 1928474700    | 94.88% | 12198651    | 1829797650      |
| Patient 2 | T33    | 11851226  | 1777683900    | 95.20% | 11282304    | 1692345600      |
| Patient 2 | normal | 26942700  | 4041405000    | 94.34% | 25418950    | 3812842500      |
| Patient 3 | T1     | 6077548   | 911632200     | 96.13% | 5842055     | 876308250       |
| Patient 3 | T21    | 9745696   | 1461854400    | 95.74% | 9330659     | 1399598850      |
| Patient 3 | T22    | 4530982   | 679647300     | 95.81% | 4341041     | 651156150       |
| Patient 3 | T31    | 4008834   | 601325100     | 94.92% | 3805217     | 570782550       |
| Patient 3 | T32    | 6339228   | 950884200     | 95.03% | 6024258     | 903638700       |

|           |        |          |            |        |          |            |
|-----------|--------|----------|------------|--------|----------|------------|
| Patient 3 | T33    | 13664850 | 2049727500 | 95.46% | 13044423 | 1956663450 |
| Patient 3 | normal | 7876790  | 1181518500 | 94.97% | 7480867  | 1122130050 |
| Patient 4 | T1     | 37350466 | 5602569900 | 94.61% | 35337186 | 5300577900 |
| Patient 4 | T21    | 30142032 | 4521304800 | 94.49% | 28480857 | 4272128550 |
| Patient 4 | T22    | 12475154 | 1871273100 | 95.75% | 11945368 | 1791805200 |
| Patient 4 | T31    | 15092174 | 2263826100 | 95.48% | 14409462 | 2161419300 |
| Patient 4 | T32    | 10925402 | 1638810300 | 95.76% | 10462200 | 1569330000 |
| Patient 4 | T33    | 10587636 | 1588145400 | 95.67% | 10128681 | 1519302150 |
| Patient 4 | normal | 29675188 | 4451278200 | 95.16% | 28238376 | 4235756400 |
| Patient 5 | T1     | 2200670  | 330100500  | 95.30% | 2097344  | 314601600  |
| Patient 5 | T21    | 5394972  | 809245800  | 95.81% | 5169181  | 775377150  |
| Patient 5 | T22    | 2657258  | 398588700  | 95.28% | 2531863  | 379779450  |
| Patient 5 | T31    | 3108924  | 466338600  | 95.41% | 2966341  | 444951150  |
| Patient 5 | T32    | 7477154  | 1121573100 | 95.33% | 7127832  | 1069174800 |
| Patient 5 | T33    | 4484220  | 672633000  | 95.21% | 4269267  | 640390050  |
| Patient 5 | normal | 2867686  | 430152900  | 95.51% | 2739052  | 410857800  |
| Patient 6 | T1     | 1228996  | 184349400  | 95.62% | 1175189  | 176278350  |
| Patient 6 | T21    | 4565322  | 684798300  | 95.42% | 4356374  | 653456100  |
| Patient 6 | T22    | 2607780  | 391167000  | 95.78% | 2497784  | 374667600  |
| Patient 6 | T23    | 1288430  | 193264500  | 95.64% | 1232260  | 184839000  |
| Patient 6 | normal | 1706826  | 256023900  | 95.97% | 1637963  | 245694450  |
| Patient 7 | T1     | 6903882  | 1035582300 | 95.88% | 6619402  | 992910300  |
| Patient 7 | T21    | 12933792 | 1940068800 | 95.92% | 12405758 | 1860863700 |
| Patient 7 | T22    | 7628024  | 1144203600 | 96.39% | 7352945  | 1102941750 |
| Patient 7 | T31    | 12530866 | 1879629900 | 95.76% | 12000062 | 1800009300 |
| Patient 7 | T32    | 3809072  | 571360800  | 95.70% | 3645240  | 546786000  |
| Patient 7 | T33    | 8493836  | 1274075400 | 95.63% | 8122311  | 1218346650 |
