# Supplementary material for: Low-abundance mutations in colorectal cancer patients and healthy adults
Source: Aging (Albany NY). 2020 Jan 12;12(1):808–24. doi: 10.18632/aging.102657 (PMC6977685; doi:10.18632/aging.102657)
Supplement: Supplementary Table 2 [file aging-12-102657-s001..xlsx]

## Sheet: 数据分析文件
chromatin	gene	station	strand	pF	pR	pR reve-comp	reference sequence	sequence without primers	amp_start	amp_end	amp_seq	insert_start	insert_end
chr1	ARID1A	26731330	+	TATTACAACCAGCAAAGTCCTCAC	CTGCTGATGTGGAGGCTG	CAGCCTCCACATCAGCAG	TATTACAACCAGCAAAGTCCTCACCCTCAGCAGCAGCAGCCACCCTACTCCCAGCAACCACCGTCCCAGACCCCTCATGCCCAACCTTCGTATCAGCAGCAGCCACAGTCTCAACCACCAC[A]GCTCCAGTCCTCTCAGCCTCCATACTCCCAGCAGCCATCCCAGCCTCCACATCAGCAGTCCCCGGCTCCATACCCCTCCCAGCAGTCGACGACACAGCAGCACCCCCAGAGCCAGCCCC	CCTCAGCAGCAGCAGCCACCCTACTCCCAGCAACCACCGTCCCAGACCCCTCATGCCCAACCTTCGTATCAGCAGCAGCCACAGTCTCAACCACCAC[A]GCTCCAGTCCTCTCAGCCTCCATACTCCCAGCAGCCATCC	26731209	26731388	TATTACAACCAGCAAAGTCCTCACCCTCAGCAGCAGCAGCCACCCTACTCCCAGCAACCACCGTCCCAGACCCCTCATGCCCAACCTTCGTATCAGCAGCAGCCACAGTCTCAACCACCACAGCTCCAGTCCTCTCAGCCTCCATACTCCCAGCAGCCATCCCAGCCTCCACATCAGCAG	26731233	26731370
chr1	ARID1A	26773716	+	TGAGGGAAACATGAGCACTG	CATGTCTATAGGAGGCAAAGAAAC	GTTTCTTTGCCTCCTATAGACATG	AGGGCCTGAGGGAAACATGAGCACTGGGGCCCCACAGCCGAATCTCATGCCTTCCAACCCAGACTCGGGGATGTATTCTCCTAGCCGCTACCCCCCgcagcagcagcagcagcagcagcaA[C]GGTGAGTAAAGCCTGGTCTCGGTGCTGCTATGGATCAGGCTTCGCCACTGCCCACCCTAATCCTGTGTTTCTTTGCCTCCTATAGACATGATTCCTATGGCAATCAGTTCTCCACCCAA	GGGCCCCACAGCCGAATCTCATGCCTTCCAACCCAGACTCGGGGATGTATTCTCCTAGCCGCTACCCCCCgcagcagcagcagcagcagcagcaA[C]GGTGAGTAAAGCCTGGTCTCGGTGCTGCTATGGATCAGGCTTCGCCACTGCCCACCCTAATCCTGT	26773601	26773806	TGAGGGAAACATGAGCACTGGGGCCCCACAGCCGAATCTCATGCCTTCCAACCCAGACTCGGGGATGTATTCTCCTAGCCGCTACCCCCCGCAGCAGCAGCAGCAGCAGCAGCAACGGTGAGTAAAGCCTGGTCTCGGTGCTGCTATGGATCAGGCTTCGCCACTGCCCACCCTAATCCTGTGTTTCTTTGCCTCCTATAGACATG	26773621	26773782
chr1	ARID1A	26779440	+	TTTGACAAGCTTCCAGTAAAGATC	CTGCTGTTGTCACATGCTTC	GAAGCATGTGACAACAGCAG	TAAGTTTGACAAGCTTCCAGTAAAGATCGTACAGAAGAATGATCCATTTGTGGTGGACTGCTCAGATAAGCTTGGGCGTGTGCAGGAGTTTGACAGTGGCCTGCTGCACTGGCGGATTGGT[G]GGGGGGACACCACTGAGCATATCCAGACCCACTTCGAGAGCAAGACAGAGCTGCTGCCTTCCCGGCCTCACGCACCCTGCCCACCAGCCCCTCGGAAGCATGTGACAACAGCAGAGGGT	GTACAGAAGAATGATCCATTTGTGGTGGACTGCTCAGATAAGCTTGGGCGTGTGCAGGAGTTTGACAGTGGCCTGCTGCACTGGCGGATTGGT[G]GGGGGGACACCACTGAGCATATCCAGACCCACTTCGAGAGCAAGACAGAGCTGCTGCCTTCCCGGCCTCACGCACCCTGCCCACCAGCCCCTCG	26779323	26779554	TTTGACAAGCTTCCAGTAAAGATCGTACAGAAGAATGATCCATTTGTGGTGGACTGCTCAGATAAGCTTGGGCGTGTGCAGGAGTTTGACAGTGGCCTGCTGCACTGGCGGATTGGTGGGGGGGACACCACTGAGCATATCCAGACCCACTTCGAGAGCAAGACAGAGCTGCTGCCTTCCCGGCCTCACGCACCCTGCCCACCAGCCCCTCGGAAGCATGTGACAACAGCAG	26779347	26779534
chr1	ARID1A	26780313	+	CAGGACCCCTTTTCCACC	TTCTTTCGGTCACTGAGGAAG	CTTCCTCAGTGACCGAAAGAA	AGCCCAGGACCCCTTTTCCACCCTGGGCCCCAATGCCGTCCTTTCCCCGCAGAGACTGGTCTTGGAAACCCTCAGCAAACTCAGCATCCAGGACAACAATGTGGACCTGATTCTGGCCACA[C]CCCCCTTCAGCCGCCTGGAGAAGTTGTATAGCACTATGGTGCGCTTCCTCAGTGACCGAAAGAACCCGGTGTGCCGGGAGATGGCTGTGGTACTGCTGGCCAACCTGGCTCAGGGGGAC	CTGGGCCCCAATGCCGTCCTTTCCCCGCAGAGACTGGTCTTGGAAACCCTCAGCAAACTCAGCATCCAGGACAACAATGTGGACCTGATTCTGGCCACA[C]CCCCCTTCAGCCGCCTGGAGAAGTTGTATAGCACTATGGTGCG	26780196	26780377	CAGGACCCCTTTTCCACCCTGGGCCCCAATGCCGTCCTTTCCCCGCAGAGACTGGTCTTGGAAACCCTCAGCAAACTCAGCATCCAGGACAACAATGTGGACCTGATTCTGGCCACACCCCCCTTCAGCCGCCTGGAGAAGTTGTATAGCACTATGGTGCGCTTCCTCAGTGACCGAAAGAA	26780214	26780356
chr1	EPHA2	16135704	+	GATCATCTATGTGACCAGCCTG	TAGGCAGCTTCTTACCCACTTC	GAAGTGGGTAAGAAGCTGCCTA	GATCATCTATGTGACCAGCCTGTCCCCTGCTGTCGGCCCAGCTAGAGCCAGCCCCGCCCCTCTGGGAGTTACCTTCTTGCGGTAAGTGACCTCGTACTTCCACACTCGGCTCTGCTGCGGC[G]GGGGGATGCTCCAGGAGACGCTAAGCGAGGTGGTGCTGCGGCCCTCCAGCCTCACCTTGGGGGGCTCTGGGCAGGACAGGCAGTGGGGGAAGTGGGTAAGAAGCTGCCTACGAGCAGGC	TCCCCTGCTGTCGGCCCAGCTAGAGCCAGCCCCGCCCCTCTGGGAGTTACCTTCTTGCGGTAAGTGACCTCGTACTTCCACACTCGGCTCTGCTGCGGC[G]GGGGGATGCTCCAGGAGACGCTAAGCGAGGTGGTGCTGCGGCCCTCCAGCCTCACCTTGGGGGGCTCTGGGCAGGACAGGCAGTGGGG	16135583	16135814	GATCATCTATGTGACCAGCCTGTCCCCTGCTGTCGGCCCAGCTAGAGCCAGCCCCGCCCCTCTGGGAGTTACCTTCTTGCGGTAAGTGACCTCGTACTTCCACACTCGGCTCTGCTGCGGCGGGGGGATGCTCCAGGAGACGCTAAGCGAGGTGGTGCTGCGGCCCTCCAGCCTCACCTTGGGGGGCTCTGGGCAGGACAGGCAGTGGGGGAAGTGGGTAAGAAGCTGCCTA	16135605	16135792
chr1	EPHA2	16138000	+	GGCCTGAGACGCCATTG	GAGGACATTGTCTACAGCGTC	GACGCTGTAGACAATGTCCTC	GTACGGAAGCTGCGGCTGGTTACCAGGCCTGAGACGCCATTGCGGGCCTCCACGGTGAAGGTGTAGTTCATGTGGGGCTCCAGGTCGCTCACTGTCACACTGGTGCGGGTCAGTCCGTGAG[G]AGGCTCCGAGTAGCGCACACTGGCCTCACACGGCCCGCATTCCCCAGACTCGGGCCAGCACTGTTCGCAGGTGACGCTGTAGACAATGTCCTCGCGGCCCCCGCTGTCCTGAGGGGGCG	CGGGCCTCCACGGTGAAGGTGTAGTTCATGTGGGGCTCCAGGTCGCTCACTGTCACACTGGTGCGGGTCAGTCCGTGAG[G]AGGCTCCGAGTAGCGCACACTGGCCTCACACGGCCCGCATTCCCCAGACTCGGGCCAGCACTGTTCGCAGGT	16137904	16138093	GGCCTGAGACGCCATTGCGGGCCTCCACGGTGAAGGTGTAGTTCATGTGGGGCTCCAGGTCGCTCACTGTCACACTGGTGCGGGTCAGTCCGTGAGGAGGCTCCGAGTAGCGCACACTGGCCTCACACGGCCCGCATTCCCCAGACTCGGGCCAGCACTGTTCGCAGGTGACGCTGTAGACAATGTCCTC	16137921	16138072
chr1	EPHA2	16148581	+	CATACGGGGCTCTTCACC	CTTCCAGGATATCGGTGCC	GGCACCGATATCCTGGAAG	ACAGTGCATACGGGGCTCTTCACCCCCCGGTGGCACCACGGCATGGTCCACACAGGTGCCGGCCACAGTGGCCAGGGAAGGTGCATCAGAGCCGGCGATGGTCTCAGGGAAGTGGGCCAGG[C]CCTGCAGCAGCTCGGGGCACTTCTTGTAGTAGACACGGACGGAGAGCAGCGCCACACAGGCACCGATATCCTGGAAGGCCAGGTAGAAGCCTTTGCGGGTGAGCGGCCCCACGGAGCGC	CCCCGGTGGCACCACGGCATGGTCCACACAGGTGCCGGCCACAGTGGCCAGGGAAGGTGCATCAGAGCCGGCGATGGTCTCAGGGAAGTGGGCCAGG[C]CCTGCAGCAGCTCGGGGCACTTCTTGTAGTAGACACGGACGGAGAGCAGCGCCACACA	16148466	16148658	CATACGGGGCTCTTCACCCCCCGGTGGCACCACGGCATGGTCCACACAGGTGCCGGCCACAGTGGCCAGGGAAGGTGCATCAGAGCCGGCGATGGTCTCAGGGAAGTGGGCCAGGCCCTGCAGCAGCTCGGGGCACTTCTTGTAGTAGACACGGACGGAGAGCAGCGCCACACAGGCACCGATATCCTGGAAG	16148484	16148639
chr1	HDGF	156745312	+	TCACCTTCCCCAGAGTAGTC	AAAACCTCAGGACTCTAGCTAAC	GTTAGCTAGAGTCCTGAGGTTTT	CTGAGCTGCACAGCCCGGCATGAAAGGGGCACCAACACCACCTCACCTTCCCCAGAGTAGTCCTCCCGGGGCCCTCCCGACCTATACCCCTTTGGCCTCCACTCACGTCTCGTGGGTCCCG[A]AAAAAAAGACTTGGTATTTGTTGGCTGTTGATTTCACGGCAGCCTCAGGCATCTCGTCAATCTGGGGTGAGATGAGGGGGTGAGGTTAGCTAGAGTCCTGAGGTTTTGAGCCTGAGGCA	CTCCCGGGGCCCTCCCGACCTATACCCCTTTGGCCTCCACTCACGTCTCGTGGGTCCCG[A]AAAAAAAGACTTGGTATTTGTTGGCTGTTGATTTCACGGCAGCCTCAGGCATCTCGTCAATCTGGGGTGAGATGAGGGGGTGAG	156745233	156745419	TCACCTTCCCCAGAGTAGTCCTCCCGGGGCCCTCCCGACCTATACCCCTTTGGCCTCCACTCACGTCTCGTGGGTCCCGAAAAAAAAGACTTGGTATTTGTTGGCTGTTGATTTCACGGCAGCCTCAGGCATCTCGTCAATCTGGGGTGAGATGAGGGGGTGAGGTTAGCTAGAGTCCTGAGGTTTT	156745253	156745396
chr1	JAK1	64841313	+	GTAACTTACCTCTCCCAAGTCAC	CTTGGGGAGAAACAGGAGC	GCTCCTGTTTCTCCCCAAG	GTGGATGGCGGAGGGCTCTGCCATCAGCAGCAAGCAGCACGGGTGTAACTTACCTCTCCCAAGTCACGGATCCTCTTTAGGAAGCGCTTTTCAAAATGTGTGGGGTCCACTTCAGTTGCTG[G]TTTTTTTTCTGAAACAATATCTGGATCTAACAGAAGAGAAAAGAAAACAGAGTGAAAGGCAGTCGATTGCCAGGGATTGCCACCCAGGCTCCTGTTTCTCCCCAAGCTGGGTTAAAGCA	GGATCCTCTTTAGGAAGCGCTTTTCAAAATGTGTGGGGTCCACTTCAGTTGCTG[G]TTTTTTTTCTGAAACAATATCTGGATCTAACAGAAGAGAAAAGAAAACAGAGTGAAAGGCAGTCGATTGCCAGGGATTGCCACCCAG	64841236	64841419	GTAACTTACCTCTCCCAAGTCACGGATCCTCTTTAGGAAGCGCTTTTCAAAATGTGTGGGGTCCACTTCAGTTGCTGGTTTTTTTTCTGAAACAATATCTGGATCTAACAGAAGAGAAAAGAAAACAGAGTGAAAGGCAGTCGATTGCCAGGGATTGCCACCCAGGCTCCTGTTTCTCCCCAAG	64841259	64841400
chr1	JAK1	64864880	+	TTCTGGGACAAACTTACCATTTTC	ATCAGGTTGTTTCTGTTGAAAAGG	CCTTTTCAACAGAAACAACCTGAT	GACTTAAGAGCTTCTGGGACAAACTTACCATTTTCTTGTTGTCCTGCTTGTTAATGCTGACCACAGACTCCTTTATTACAATGTGAGTGATTTCAGGGAAGTAAGAAAAATTGTTCCACTC[T]TCCCGGATCTTGTTTTTCTCCTCATCCTTCTTGTGTTTATTTTCCAGTTTTTTCCGCTTCAGTTTATTTTTTTCCTTTTCAACAGAAACAACCTGATAAGATACATAAAAGGGACAGGG	TTGTTGTCCTGCTTGTTAATGCTGACCACAGACTCCTTTATTACAATGTGAGTGATTTCAGGGAAGTAAGAAAAATTGTTCCACTC[T]TCCCGGATCTTGTTTTTCTCCTCATCCTTCTTGTGTTTATTTTCCAGTTTTTTCCGCTTCAGTTTATTTTTTT	64864770	64864977	TTCTGGGACAAACTTACCATTTTCTTGTTGTCCTGCTTGTTAATGCTGACCACAGACTCCTTTATTACAATGTGAGTGATTTCAGGGAAGTAAGAAAAATTGTTCCACTCTTCCCGGATCTTGTTTTTCTCCTCATCCTTCTTGTGTTTATTTTCCAGTTTTTTCCGCTTCAGTTTATTTTTTTCCTTTTCAACAGAAACAACCTGAT	64864794	64864953
chr1	JAK1	64873428	+	CTCTACAATGCCTCTCCCATC	TTCCAGGTTCTATTTCACCAATTG	CAATTGGTGAAATAGAACCTGGAA	TGAGCTCTACAATGCCTCTCCCATCCCACAAACTCCAGCTTCTCCTGGGCCCAAACTTCCTACCTGAGCAAACAGATACTCCAGTGAGCTGGCATCAAGGAGAGGGGTTGCATCTGGAATC[T]TTTTTTTCTCGTAGCCATTTTTCTGCTTCTTTGGAGAATGACGCCACACTGACTGCTCATTGTCGTTGGTTCCATGCCAATTGGTGAAATAGAACCTGGAAGGCAGGAAAATGAATGCC	CCACAAACTCCAGCTTCTCCTGGGCCCAAACTTCCTACCTGAGCAAACAGATACTCCAGTGAGCTGGCATCAAGGAGAGGGGTTGCATCTGGAATC[T]TTTTTTTCTCGTAGCCATTTTTCTGCTTCTTTGGAGAATGACGCCACACTGACTGCTCATTGTCGTTGGTTCCATGC	64873311	64873529	CTCTACAATGCCTCTCCCATCCCACAAACTCCAGCTTCTCCTGGGCCCAAACTTCCTACCTGAGCAAACAGATACTCCAGTGAGCTGGCATCAAGGAGAGGGGTTGCATCTGGAATCTTTTTTTTCTCGTAGCCATTTTTCTGCTTCTTTGGAGAATGACGCCACACTGACTGCTCATTGTCGTTGGTTCCATGCCAATTGGTGAAATAGAACCTGGAA	64873332	64873505
chr10	FGFR2	121520100	+	TATTTACTGCCGTTCTTTTCCAC	TCCTCCTTTCTTCCCTCTCTC	GAGAGAGGGAAGAAAGGAGGA	CTTGAGAACCTTGAGGTAGGGCAGCCCGTCGGGCCCGTATTTACTGCCGTTCTTTTCCACGTGCTTGATCCACTGGATGTGGGGCTGGGCATCACTGTAAACCTTGCAGACAAACTCTACG[T]CTCCTCCGACCACTGTGGAGGCATTTGCCGGCAGTCCGGCTTGGAGGATGGGCCGGTGAGGCGATCGCTCTGGTGGAGAGAGGGAAGAAAGGAGGAGTGGGGATGGGAGAATGAGAGAC	GTGCTTGATCCACTGGATGTGGGGCTGGGCATCACTGTAAACCTTGCAGACAAACTCTACG[T]CTCCTCCGACCACTGTGGAGGCATTTGCCGGCAGTCCGGCTTGGAGGATGGGCCGGTGAGGCGATCGCTCTGGTG	121520016	121520196	TATTTACTGCCGTTCTTTTCCACGTGCTTGATCCACTGGATGTGGGGCTGGGCATCACTGTAAACCTTGCAGACAAACTCTACGTCTCCTCCGACCACTGTGGAGGCATTTGCCGGCAGTCCGGCTTGGAGGATGGGCCGGTGAGGCGATCGCTCTGGTGGAGAGAGGGAAGAAAGGAGGA	121520039	121520175
chr10	PTEN	87864510	+	ATCTCTCTCCTCCTTTTTCTTCAG	GTCTACTCCCACGTTCTAAGAG	CTCTTAGAACGTGGGAGTAGAC	TCCATCCTGCAGAAGAAGCCCCGCCACCAGCAGCTTCTGCCATCTCTCTCCTCCTTTTTCTTCAGCCACAGGCTCCCAGACATGACAGCCATCATCAAAGAGATCGTTAGCAGAAACAAAA[G]GAGATATCAAGAGGATGGATTCGACTTAGACTTGACCTGTATCCATTTCTGCGGCTGCTCCTCTTTACCTTTCTGTCACTCTCTTAGAACGTGGGAGTAGACGGATGCGAAAATGTCCG	CCACAGGCTCCCAGACATGACAGCCATCATCAAAGAGATCGTTAGCAGAAACAAAA[G]GAGATATCAAGAGGATGGATTCGACTTAGACTTGACCTGTATCCATTTCTGCGGCTGCTCCTCTTTACCTTTCTGTCACT	87864430	87864612	ATCTCTCTCCTCCTTTTTCTTCAGCCACAGGCTCCCAGACATGACAGCCATCATCAAAGAGATCGTTAGCAGAAACAAAAGGAGATATCAAGAGGATGGATTCGACTTAGACTTGACCTGTATCCATTTCTGCGGCTGCTCCTCTTTACCTTTCTGTCACTCTCTTAGAACGTGGGAGTAGAC	87864454	87864590
chr10	PTEN	87894050	+	TAGTTTGATTGCTGCATATTTCAG	TGAAAACACAACATGAATATAAACATC	GATGTTTATATTCATGTTGTGTTTTCA	ACTTTCTTTTCATAACTAGCTAATGTTTTAAAAAGTATTCTTTTAGTTTGATTGCTGCATATTTCAGATATTTCTTTCCTTAACTAAAGTACTCAGATATTTATCCAAACATTATTGCTAT[G]GGATTTCCTGCAGAAAGACTTGAAGGCGTATACAGGAACAATATTGATGATGTAGTAAGGTAAGAATGCTTTGATTTTCTATTTCAAATATTGATGTTTATATTCATGTTGTGTTTTCA	ATATTTCTTTCCTTAACTAAAGTACTCAGATATTTATCCAAACATTATTGCTAT[G]GGATTTCCTGCAGAAAGACTTGAAGGCGTATACAGGAACAATATTGATGATGTAGTAAGGTAAGAATGCTTTGATTTTCTATTTCAAATATT	87893972	87894169	TAGTTTGATTGCTGCATATTTCAGATATTTCTTTCCTTAACTAAAGTACTCAGATATTTATCCAAACATTATTGCTATGGGATTTCCTGCAGAAAGACTTGAAGGCGTATACAGGAACAATATTGATGATGTAGTAAGGTAAGAATGCTTTGATTTTCTATTTCAAATATTGATGTTTATATTCATGTTGTGTTTTCA	87893996	87894142
chr10	PTEN	87933148	+	CACCACAGCTAGAACTTATCAAAC	CTTTTTGTCTCTGGTCCTTACTTC	GAAGTAAGGACCAGAGACAAAAAG	TTTGAAGACCATAACCCACCACAGCTAGAACTTATCAAACCCTTTTGTGAAGATCTTGACCAATGGCTAAGTGAAGATGACAATCATGTTGCAGCAATTCACTGTAAAGCTGGAAAGGGAC[G]AACTGGTGTAATGATATGTGCATATTTATTACATCGGGGCAAATTTTTAAAGGCACAAGAGGCCCTAGATTTCTATGGGGAAGTAAGGACCAGAGACAAAAAGGTAAGTTATTTTTTGA	CCTTTTGTGAAGATCTTGACCAATGGCTAAGTGAAGATGACAATCATGTTGCAGCAATTCACTGTAAAGCTGGAAAGGGAC[G]AACTGGTGTAATGATATGTGCATATTTATTACATCGGGGCAAATTTTTAAAGGCACAAGAGGCCCTAGATTTCTATGGG	87933043	87933251	CACCACAGCTAGAACTTATCAAACCCTTTTGTGAAGATCTTGACCAATGGCTAAGTGAAGATGACAATCATGTTGCAGCAATTCACTGTAAAGCTGGAAAGGGACGAACTGGTGTAATGATATGTGCATATTTATTACATCGGGGCAAATTTTTAAAGGCACAAGAGGCCCTAGATTTCTATGGGGAAGTAAGGACCAGAGACAAAAAG	87933067	87933227
chr10	PTEN	87957972	+	ATATATTCCTCCAATTCAGGACCC	AGCTTTTAATCTGTCCTTATTTTGG	CCAAAATAAGGACAGATTAAAAGCT	AGATCCTCAGTTTGTGGTCTGCCAGCTAAAGGTGAAGATATATTCCTCCAATTCAGGACCCACACGACGGGAAGACAAGTTCATGTACTTTGAGTTCCCTCAGCCGTTACCTGTGTGTGGT[G]ATATCAAAGTAGAGTTCTTCCACAAACAGAACAAGATGCTAAAAAAGGTTTGTACTTTACTTTCATTGGGAGAAATATCCAAAATAAGGACAGATTAAAAGCTATATTTTATTTTATGA	ACACGACGGGAAGACAAGTTCATGTACTTTGAGTTCCCTCAGCCGTTACCTGTGTGTGGT[G]ATATCAAAGTAGAGTTCTTCCACAAACAGAACAAGATGCTAAAAAAGGTTTGTACTTTACTTTCATTGGGAGAAATAT	87957888	87958075	ATATATTCCTCCAATTCAGGACCCACACGACGGGAAGACAAGTTCATGTACTTTGAGTTCCCTCAGCCGTTACCTGTGTGTGGTGATATCAAAGTAGAGTTCTTCCACAAACAGAACAAGATGCTAAAAAAGGTTTGTACTTTACTTTCATTGGGAGAAATATCCAAAATAAGGACAGATTAAAAGCT	87957912	87958050
chr10	PTEN	87961025	+	ATACATTCTTCATACCAGGACCAG	AATTTGGAGAAAAGTATCGGTTGG	CCAACCGATACTTTTCTCCAAATT	TTCACTTTTGGGTAAATACATTCTTCATACCAGGACCAGAGGAAACCTCAGAAAAAGTAGAAAATGGAAGTCTATGTGATCAAGAAATCGATAGCATTTGCAGTATAGAGCGTGCAGATAA[T]GACAAGGAATATCTAGTACTTACTTTAACAAAAAATGATCTTGACAAAGCAAATAAAGACAAAGCCAACCGATACTTTTCTCCAAATTTTAAGGTCAGTTAAATTAAACATTTTGTGGG	AGGAAACCTCAGAAAAAGTAGAAAATGGAAGTCTATGTGATCAAGAAATCGATAGCATTTGCAGTATAGAGCGTGCAGATAA[T]GACAAGGAATATCTAGTACTTACTTTAACAAAAAATGATCTTGACAAAGCAAATAAAGACAAAG	87960919	87961113	ATACATTCTTCATACCAGGACCAGAGGAAACCTCAGAAAAAGTAGAAAATGGAAGTCTATGTGATCAAGAAATCGATAGCATTTGCAGTATAGAGCGTGCAGATAATGACAAGGAATATCTAGTACTTACTTTAACAAAAAATGATCTTGACAAAGCAAATAAAGACAAAGCCAACCGATACTTTTCTCCAAATT	87960943	87961089
chr11	DLAT	112033459	+	GTAGAAGTCTTCCTGGTATTAAGC	ATTAAGAGCTGAAGAAATCTCACC	GGTGAGATTTCTTCAGCTCTTAAT	CTGCCAGACTTTTATTATGTAGAAGTCTTCCTGGTATTAAGCAATAATATGTGTTTGTTTCTGCAGGTACTTCTTCCTGCCCTCTCTCCCACCATGACCATGGGCACAGTTCAGAGATGGG[A]AAAAAAAGTGGGTGAGAAGCTAAGTGAAGGAGACTTACTGGCAGAGATAGAAACTGACAAAGCCACTATAGGTGAGATTTCTTCAGCTCTTAATGGTTGAGGCACTGAGTTTCCCAATG	AATAATATGTGTTTGTTTCTGCAGGTACTTCTTCCTGCCCTCTCTCCCACCATGACCATGGGCACAGTTCAGAGATGGG[A]AAAAAAAGTGGGTGAGAAGCTAAGTGAAGGAGACTTACTGGCAGAGATAGAAACTGACAAAGCCACTATA	112033356	112033553	GTAGAAGTCTTCCTGGTATTAAGCAATAATATGTGTTTGTTTCTGCAGGTACTTCTTCCTGCCCTCTCTCCCACCATGACCATGGGCACAGTTCAGAGATGGGAAAAAAAAGTGGGTGAGAAGCTAAGTGAAGGAGACTTACTGGCAGAGATAGAAACTGACAAAGCCACTATAGGTGAGATTTCTTCAGCTCTTAAT	112033380	112033529
chr11	NFRKB	129882601	+	GACCCCTTCAGTACTGCTTAG	AAGAATATGCAGATAAGACCCCTC	GAGGGGTCTTATCTGCATATTCTT	AGAGGGGGCCTGTGAGAGAGGTGCGACCCCTTCAGTACTGCTTAGCGGCTCGGCCAGGTCCTCTGCCTCTGATTTGATCGtttttattttcttcttcttcttttcctctttttcCTTAACC[T]TTTTTTTAAGGACAGCCAAGTCATATAAGGCTAGAAAGGCAAAGTAACACCAGTCACAGAAATGTATCTCCTACACAGGGAAGTGAGGGGTCTTATCTGCATATTCTTTTCCCAAGGCC	CGGCTCGGCCAGGTCCTCTGCCTCTGATTTGATCGtttttattttcttcttcttcttttcctctttttcCTTAACC[T]TTTTTTTAAGGACAGCCAAGTCATATAAGGCTAGAAAGGCAAAGTAACACCAGTCACAGAAATGTATCTCCTACACAGGGAAGT	129882504	129882709	GACCCCTTCAGTACTGCTTAGCGGCTCGGCCAGGTCCTCTGCCTCTGATTTGATCGTTTTTATTTTCTTCTTCTTCTTTTCCTCTTTTTCCTTAACCTTTTTTTTAAGGACAGCCAAGTCATATAAGGCTAGAAAGGCAAAGTAACACCAGTCACAGAAATGTATCTCCTACACAGGGAAGTGAGGGGTCTTATCTGCATATTCTT	129882525	129882685
chr11	PLEKHA7	16800978	+	CAGGTGAAGTCTCTTGGaaaaac	CAACAGGAGATGGAAAATGCTTG	CAAGCATTTTCCATCTCCTGTTG	AGGGGGAGAAGGACTCTGAGCAGTGCTCACAACCCCCACAGGTGAAGTCTCTTGGaaaaacaaaaaacaaaaaacaaaaaacaaGAGCTCAGAAGAGATGGACAGGTATCAGGTCACCTGG[A]AAAAAAAGGCTCTTCTGTGTTGCTCCTGCAGGGTCTGCTTCAGCTGTTCCACATCATTCTCCAACTTCAGGTATTCGTTCCAAGCATTTTCCATCTCCTGTTGGCCAAGACAATGCTTC	aaaaaacaaaaaacaaaaaacaaGAGCTCAGAAGAGATGGACAGGTATCAGGTCACCTGG[A]AAAAAAAGGCTCTTCTGTGTTGCTCCTGCAGGGTCTGCTTCAGCTGTTCCACATCATTCTCCAACTTCAGGTATTCGTTC	16800895	16801081	CAGGTGAAGTCTCTTGGAAAAACAAAAAACAAAAAACAAAAAACAAGAGCTCAGAAGAGATGGACAGGTATCAGGTCACCTGGAAAAAAAAGGCTCTTCTGTGTTGCTCCTGCAGGGTCTGCTTCAGCTGTTCCACATCATTCTCCAACTTCAGGTATTCGTTCCAAGCATTTTCCATCTCCTGTTG	16800918	16801058
chr11	SLC3A2	62882057	+	CAATTCACAAGAACCAGAAGGATG	CAGGAAACCAGACAAAAGTTCTAG	CTAGAACTTTTGTCTGGTTTCCTG	GGGCCTTGTGCTGGGTCCAATTCACAAGAACCAGAAGGATGATGTCGCTCAGACTGACTTGCTGCAGATCGACCCCAATTTTGGCTCCAAGGAAGATTTTGACAGTCTCTTGCAATCGGCT[A]AAAAAAAGAGTGGGTATCCTGGGGTTCCCAAGGAAACAGCTAGAAAGGACTTGGCCAGAGGAAAAGTAGGCTAGAACTTTTGTCTGGTTTCCTGCTAACTGGCTCTGAGTTTTCCTAGG	ATGTCGCTCAGACTGACTTGCTGCAGATCGACCCCAATTTTGGCTCCAAGGAAGATTTTGACAGTCTCTTGCAATCGGCT[A]AAAAAAAGAGTGGGTATCCTGGGGTTCCCAAGGAAACAGCTAGAAAGGACTTGGCCAGAGGAAAAGTAGG	62881953	62882151	CAATTCACAAGAACCAGAAGGATGATGTCGCTCAGACTGACTTGCTGCAGATCGACCCCAATTTTGGCTCCAAGGAAGATTTTGACAGTCTCTTGCAATCGGCTAAAAAAAAGAGTGGGTATCCTGGGGTTCCCAAGGAAACAGCTAGAAAGGACTTGGCCAGAGGAAAAGTAGGCTAGAACTTTTGTCTGGTTTCCTG	62881977	62882127
chr12	CHD4	6583245	+	CTAGTGGAACGGCCCATG	TCATTAAACAGGAAGAAAGTGTGG	CCACACTTTCTTCCTGTTTAATGA	AGAGGGCAGATGAGCGGGGCCCACTGCTCTAGTGGAACGGCCCATGGGTGGGGGGCGGGGCCGGCCACACACACCTCGGTCCTCCTGGGAGCCATCATTGTAGTTGACCTGTTTACGGATT[C]TTTTTCCTTTGCCCAGATTTCGGGCTAGATCTTCTTGCTGCTGCTCATAATGGTGCCGCAGCAATTTCTCCCAGTAGTCAGGATCCACACTTTCTTCCTGTTTAATGATTTCCCGTTCT	GGTGGGGGGCGGGGCCGGCCACACACACCTCGGTCCTCCTGGGAGCCATCATTGTAGTTGACCTGTTTACGGATT[C]TTTTTCCTTTGCCCAGATTTCGGGCTAGATCTTCTTGCTGCTGCTCATAATGGTGCCGCAGCAATTTCTCCCAGTAGTCAGGAT	6583152	6583353	CTAGTGGAACGGCCCATGGGTGGGGGGCGGGGCCGGCCACACACACCTCGGTCCTCCTGGGAGCCATCATTGTAGTTGACCTGTTTACGGATTCTTTTTCCTTTGCCCAGATTTCGGGCTAGATCTTCTTGCTGCTGCTCATAATGGTGCCGCAGCAATTTCTCCCAGTAGTCAGGATCCACACTTTCTTCCTGTTTAATGA	6583170	6583329
chr12	CHD4	6591592	+	GCGTTCGTATTTATAACCTTCATG	ACTCATCTTTTCCCAGGTATCATG	CATGATACCTGGGAAAAGATGAGT	AAGCGGTCAATGGCCTCTTGCCGCATGTTCCCAGTGATTCCACCATCGATGCGTTCGTATTTATAACCTTCATGTTCCAAGAAATCCTCTAGCAGGTCTAGCATCTTGGTCATCTGCAAAA[G]AAGCACGGTTTAATTATGGAAGAGTCAGATGGTAATCCCTTTCCTTAGGTCACTAAGGGTTGTCTATGACTGTTCCCTAAAGCTCCCAGTCCACATGATACCTGGGAAAAGATGAGTAC	TTCCAAGAAATCCTCTAGCAGGTCTAGCATCTTGGTCATCTGCAAAA[G]AAGCACGGTTTAATTATGGAAGAGTCAGATGGTAATCCCTTTCCTTAGGTCACTAAGGGTTGTCTATGACTGTTCCCTAAAGCTCCCAGTCCA	6591521	6591709	GCGTTCGTATTTATAACCTTCATGTTCCAAGAAATCCTCTAGCAGGTCTAGCATCTTGGTCATCTGCAAAAGAAGCACGGTTTAATTATGGAAGAGTCAGATGGTAATCCCTTTCCTTAGGTCACTAAGGGTTGTCTATGACTGTTCCCTAAAGCTCCCAGTCCACATGATACCTGGGAAAAGATGAGT	6591545	6591685
chr12	CHD4	6602410	+	TCTGATTCCCCGTAACATTCAG	ACCACTCTTTGCCAAATATATGTAG	CTACATATATTTGGCAAAGAGTGGT	AGAAACAAATGCCCTCAGCCCTTCAACCCTTCTCAGAGCTCCTCCCTTCTTCCTCTGATTCCCCGTAACATTCAGTCACCCACTCACCTCCTTTTTTTGGCGCTTGCTCTTAGGGATTTTA[G]GGTCCCGAGGTTTCTTAGGCTTTTTCTTCTTCTTGAGCTTTGGAGTCTCTGTTTCTGACAAATCCTCTTCTGGGTCCTCTTCATTTTCTACATATATTTGGCAAAGAGTGGTAGGCAGG	TCACCCACTCACCTCCTTTTTTTGGCGCTTGCTCTTAGGGATTTTA[G]GGTCCCGAGGTTTCTTAGGCTTTTTCTTCTTCTTGAGCTTTGGAGTCTCTGTTTCTGACAAATCCTCTTCTGGGTCCTCTTCATTTT	6602342	6602522	TCTGATTCCCCGTAACATTCAGTCACCCACTCACCTCCTTTTTTTGGCGCTTGCTCTTAGGGATTTTAGGGTCCCGAGGTTTCTTAGGCTTTTTCTTCTTCTTGAGCTTTGGAGTCTCTGTTTCTGACAAATCCTCTTCTGGGTCCTCTTCATTTTCTACATATATTTGGCAAAGAGTGGT	6602364	6602497
chr12	ERBB3	56085070	+	TGTCTCTCTCATTTACATAATCTGC	CTGGAGTTGGTGTTATAGTTCAAC	GTTGAACTATAACACCAACTCCAG	TTTTGCCCTGTTGTCTCTCTCATTTACATAATCTGCTCTGTCACAGTGGATTCGAGAAGTGACAGGCTATGTCCTCGTGGCCATGAATGAATTCTCTACTCTACCATTGCCCAACCTCCGC[G]TGGTGCGAGGGACCCAGGTCTACGATGGGAAGTTTGCCATCTTCGTCATGTTGAACTATAACACCAACTCCAGCCACGCTCTGCGCCAGCTCCGCTTGACTCAGCTCACCGGTCAGTTC	TCTGTCACAGTGGATTCGAGAAGTGACAGGCTATGTCCTCGTGGCCATGAATGAATTCTCTACTCTACCATTGCCCAACCTCCGC[G]TGGTGCGAGGGACCCAGGTCTACGATGGGAAGTTTGCCATCTTCGTCAT	56084960	56085143	TGTCTCTCTCATTTACATAATCTGCTCTGTCACAGTGGATTCGAGAAGTGACAGGCTATGTCCTCGTGGCCATGAATGAATTCTCTACTCTACCATTGCCCAACCTCCGCGTGGTGCGAGGGACCCAGGTCTACGATGGGAAGTTTGCCATCTTCGTCATGTTGAACTATAACACCAACTCCAG	56084985	56085119
chr12	ERBB3	56087948	+	GTCACTGCTTTGGGCCC	GAGGCTCATCAGATTTATGTTACG	CGTAACATAAATCTGATGAGCCTC	GGTCACTGCTTTGGGCCCAACCCCAACCAGTGCTGCCATGATGAGTGTGCCGGGGGCTGCTCAGGCCCTCAGGACACAGACTGCTTTGTATGTACCCTTTCCATTGCCTGGGTTCTGAAAT[T]GGGATGTGGCCTTTGAGGAGGAGGTAGGGGTACACACGTAACATAAATCTGATGAGCCTCCTTTTTTCCCAGGCCTGCCGGCACTTCAATGACAGTGGAGCCTGTGTACCTCGCTGTCC	AACCCCAACCAGTGCTGCCATGATGAGTGTGCCGGGGGCTGCTCAGGCCCTCAGGACACAGACTGCTTTGTATGTACCCTTTCCATTGCCTGGGTTCTGAAAT[T]GGGATGTGGCCTTTGAGGAGGAGGTAGGGGTACACA	56087828	56088008	GTCACTGCTTTGGGCCCAACCCCAACCAGTGCTGCCATGATGAGTGTGCCGGGGGCTGCTCAGGCCCTCAGGACACAGACTGCTTTGTATGTACCCTTTCCATTGCCTGGGTTCTGAAATTGGGATGTGGCCTTTGAGGAGGAGGTAGGGGTACACACGTAACATAAATCTGATGAGCCTC	56087845	56087984
chr12	KMT2D	49040709	+	CATATGGGTCAGTGTAGGAGC	CCTGGAGTTAAAGACACCTGATG	CATCAGGTGTCTTTAACTCCAGG	GCTCTCAGGGGGCGGAGGTTGGGGCCGAGGAGTCAATGGGGGCTGAGCATATGGGTCAGTGTAGGAGCCAGGGCGAAAGATGTCTGGGTGACTTGGAGGAGAAGGTGCCAAAGCCTGGGCA[G]GGGGTGGCTCCTGGGGCCTTAGGCCCAAGCCCGGGCTCTGGGGCTCTACCTGAGATGCCCGAGGGGTCAGGGGGGCTTTGAAGACATCAGGTGTCTTTAACTCCAGGCCACCCAGGTGG	CAGGGCGAAAGATGTCTGGGTGACTTGGAGGAGAAGGTGCCAAAGCCTGGGCA[G]GGGGTGGCTCCTGGGGCCTTAGGCCCAAGCCCGGGCTCTGGGGCTCTACCTGAGATGCCCGAGGGGTCAGGGGGGCTTTGAAGA	49040635	49040816	CATATGGGTCAGTGTAGGAGCCAGGGCGAAAGATGTCTGGGTGACTTGGAGGAGAAGGTGCCAAAGCCTGGGCAGGGGGTGGCTCCTGGGGCCTTAGGCCCAAGCCCGGGCTCTGGGGCTCTACCTGAGATGCCCGAGGGGTCAGGGGGGCTTTGAAGACATCAGGTGTCTTTAACTCCAGG	49040656	49040793
chr12	KMT2D	49049884	+	ACAATAGTGAGTCATCAGTCTCTG	TTAACGAGATCTCTAATCTGAGCC	GGCTCAGATTAGAGATCTCGTTAA	AGCATCGCACAATAGTGAGTCATCAGTCTCTGGCAGTGAGTCAGTACAGAGCCGTAGGGAGCCCTCATCTCGGGCTGGACTAACATCCGTAGAGACCCCCAACTCCATGGACAGGGAGCCA[C]CCCCCTCCGGGTCTGGAGAGCCCAGGAGGGGCTCTGAGCCAGGAAAACTGGCACTGGCATCACCCTGGCTCAGATTAGAGATCTCGTTAACGATGTCGGATTTGATGAGAGTGGGTGGT	GCAGTGAGTCAGTACAGAGCCGTAGGGAGCCCTCATCTCGGGCTGGACTAACATCCGTAGAGACCCCCAACTCCATGGACAGGGAGCCA[C]CCCCCTCCGGGTCTGGAGAGCCCAGGAGGGGCTCTGAGCCAGGAAAACTGGCACTGGCATCACCCT	49049771	49049974	ACAATAGTGAGTCATCAGTCTCTGGCAGTGAGTCAGTACAGAGCCGTAGGGAGCCCTCATCTCGGGCTGGACTAACATCCGTAGAGACCCCCAACTCCATGGACAGGGAGCCACCCCCCTCCGGGTCTGGAGAGCCCAGGAGGGGCTCTGAGCCAGGAAAACTGGCACTGGCATCACCCTGGCTCAGATTAGAGATCTCGTTAA	49049795	49049950
chr12	KMT2D	49051672	+	GAAGCAGGTGAGTCCTCAG	ACCACCTGAAGAATCACCTATG	CATAGGTGATTCTTCAGGTGGT	GGTGGTGGGGAAGCAGGTGAGTCCTCAGGTGGTGGGGATGTGGGGGAGTCCTCAGGTGGTGGGGAGAGGCGTGAAGCCTCAGGTGGAGGGGACGTGGGAGACTCCTCAGGCGGTGGGGACA[A]GGGAGATTCCTCAGGCGGTGGAGACAGGCGTGACACCACAGGCAGGGGGGATAGGCGCGATACCTCAGGTGGGGGGGACATAGGTGATTCTTCAGGTGGTGGGGACATAGGCGAGTCCT	GTGGTGGGGATGTGGGGGAGTCCTCAGGTGGTGGGGAGAGGCGTGAAGCCTCAGGTGGAGGGGACGTGGGAGACTCCTCAGGCGGTGGGGACA[A]GGGAGATTCCTCAGGCGGTGGAGACAGGCGTGACACCACAGGCAGGGGGGATAGGCGCGATACCTCAGGTGGGGGGGA	49051560	49051772	GAAGCAGGTGAGTCCTCAGGTGGTGGGGATGTGGGGGAGTCCTCAGGTGGTGGGGAGAGGCGTGAAGCCTCAGGTGGAGGGGACGTGGGAGACTCCTCAGGCGGTGGGGACAAGGGAGATTCCTCAGGCGGTGGAGACAGGCGTGACACCACAGGCAGGGGGGATAGGCGCGATACCTCAGGTGGGGGGGACATAGGTGATTCTTCAGGTGGT	49051579	49051750
chr12	KRAS	25225660	+	ATGATTTTGCAGAAAACAGATCTG	CTGAAGATGTACCTATGGTCCTAG	CTAGGACCATAGGTACATCTTCAG	AAACTGATATATTAAATGACATAACAGTTATGATTTTGCAGAAAACAGATCTGTATTTATTTCAGTGTTACTTACCTGTCTTGTCTTTGCTGATGTTTCAATAAAAGGAATTCCATAACTT[C]TTGCTAAGTCCTGAGCCTGTTTTGTGTCTACTGTTCTAGAAGGCAAATCACATTTATTTCCTACTAGGACCATAGGTACATCTTCAGAGTCCTTAACTCTTTTAATTTGTTCTCTGGGA	TATTTATTTCAGTGTTACTTACCTGTCTTGTCTTTGCTGATGTTTCAATAAAAGGAATTCCATAACTT[C]TTGCTAAGTCCTGAGCCTGTTTTGTGTCTACTGTTCTAGAAGGCAAATCACATTTATTTCCTA	25225568	25225747	ATGATTTTGCAGAAAACAGATCTGTATTTATTTCAGTGTTACTTACCTGTCTTGTCTTTGCTGATGTTTCAATAAAAGGAATTCCATAACTTCTTGCTAAGTCCTGAGCCTGTTTTGTGTCTACTGTTCTAGAAGGCAAATCACATTTATTTCCTACTAGGACCATAGGTACATCTTCAG	25225592	25225723
chr12	KRAS	25227341	+	TTATGGCAAATACACAAAGAAAGC	AAAAGGTGCACTGTAATAATCCAG	CTGGATTATTACAGTGCACCTTTT	CAATTTAAACCCACCTATAATGGTGAATATCTTCAAATGATTTAGTATTATTTATGGCAAATACACAAAGAAAGCCCTCCCCAGTCCTCATGTACTGGTCCCTCATTGCACTGTACTCCTC[T]TGACCTGCTGTGTCGAGAATATCCAAGAGACAGGTTTCTCCATCAATTACTACTTGCTTCCTGTAGGAATCCTGAGAAGGGAGAAACACAGTCTGGATTATTACAGTGCACCTTTTACT	CCTCCCCAGTCCTCATGTACTGGTCCCTCATTGCACTGTACTCCTC[T]TGACCTGCTGTGTCGAGAATATCCAAGAGACAGGTTTCTCCATCAATTACTACTTGCTTCCTGTAGGAATCCTGAGAAGGGAGAAACACAGT	25227271	25227457	TTATGGCAAATACACAAAGAAAGCCCTCCCCAGTCCTCATGTACTGGTCCCTCATTGCACTGTACTCCTCTTGACCTGCTGTGTCGAGAATATCCAAGAGACAGGTTTCTCCATCAATTACTACTTGCTTCCTGTAGGAATCCTGAGAAGGGAGAAACACAGTCTGGATTATTACAGTGCACCTTTT	25227295	25227433
chr12	KRAS	25245347	+	TATTGTTGGATCATATTCGTCCAC	AGTGTATTAACCTTATGTGTGACATG	CATGTCACACATAAGGTTAATACACT	CAAAGAATGGTCCTGCACCAGTAATATGCATATTAAAACAAGATTTACCTCTATTGTTGGATCATATTCGTCCACAAAATGATTCTGAATTAGCTGTATCGTCAAGGCACTCTTGCCTACG[C]CACCAGCTCCAACTACCACAAGTTTATATTCAGTCATTTTCAGCAGGCCTTATAATAAAAATAATGAAAATGTGACTATATTAGAACATGTCACACATAAGGTTAATACACTATCAAAT	AAAATGATTCTGAATTAGCTGTATCGTCAAGGCACTCTTGCCTACG[C]CACCAGCTCCAACTACCACAAGTTTATATTCAGTCATTTTCAGCAGGCCTTATAATAAAAATAATGAAAATGTGACTATATTAGAA	25245277	25245459	TATTGTTGGATCATATTCGTCCACAAAATGATTCTGAATTAGCTGTATCGTCAAGGCACTCTTGCCTACGCCACCAGCTCCAACTACCACAAGTTTATATTCAGTCATTTTCAGCAGGCCTTATAATAAAAATAATGAAAATGTGACTATATTAGAACATGTCACACATAAGGTTAATACACT	25245301	25245433
chr12	POLE	132673664	+	CGGGATGTGGCTTACGTG	CATGTTAGAATCATCCTGGCTTC	GAAGCCAGGATGATTCTAACATG	CAGCAGGGGCAGCCGGGATGTGGCTTACGTGCCTGGGGCTGCTCCGTGGCCATCCGGCACATGTCCTCCGGGTCTAGCTCCACGGGATCATAGCCTAGCTTGGCCTTGGCGGCCGCCTTGA[G]ATTATGACTGCCCACAGGAAGGTAACTGTCCCTCTTCACCCACCTGGAAGGAGAATGAGAACAGAAGCCAGGATGATTCTAACATGCAGCCCGGGAACCCCTGAGAACTGGCAAAACTG	CCTGGGGCTGCTCCGTGGCCATCCGGCACATGTCCTCCGGGTCTAGCTCCACGGGATCATAGCCTAGCTTGGCCTTGGCGGCCGCCTTGA[G]ATTATGACTGCCCACAGGAAGGTAACTGTCCCTCTTCACCCACCTGGAAGGAGAATGAGAACA	132673556	132673750	CGGGATGTGGCTTACGTGCCTGGGGCTGCTCCGTGGCCATCCGGCACATGTCCTCCGGGTCTAGCTCCACGGGATCATAGCCTAGCTTGGCCTTGGCGGCCGCCTTGAGATTATGACTGCCCACAGGAAGGTAACTGTCCCTCTTCACCCACCTGGAAGGAGAATGAGAACAGAAGCCAGGATGATTCTAACATG	132673574	132673727
chr12	POLE	132676598	+	CCATCCCAGGAGCTTACTTC	GAGCTTGGCTTTATGCTTATTTTG	CAAAATAAGCATAAAGCCAAGCTC	CTGCTGTAGTATGGGGACCAGACAAGGTCCCCATCCCAGGAGCTTACTTCCCAGAAGCCACCTGCTCACCTGGCCATCGATCATGTAGGAAATCATCATAATCTGGTCTGTCTCAGCATCA[G]GAAACTTGAGGGGCAGTTTGGTCGTCTCAATGTCAAATGCCAAAACCACAGGGTCCTGTGGGGACAAAATAAGCATAAAGCCAAGCTCTAAACTCCCCATTAGGCCTCCCTGAACACCC	CCAGAAGCCACCTGCTCACCTGGCCATCGATCATGTAGGAAATCATCATAATCTGGTCTGTCTCAGCATCA[G]GAAACTTGAGGGGCAGTTTGGTCGTCTCAATGTCAAATGCCAAAACCACAGGGTCCTGTGGGGA	132676507	132676686	CCATCCCAGGAGCTTACTTCCCAGAAGCCACCTGCTCACCTGGCCATCGATCATGTAGGAAATCATCATAATCTGGTCTGTCTCAGCATCAGGAAACTTGAGGGGCAGTTTGGTCGTCTCAATGTCAAATGCCAAAACCACAGGGTCCTGTGGGGACAAAATAAGCATAAAGCCAAGCTC	132676527	132676662
chr12	SETD1B	121804752	+	GATTCTTTCGCGTGTGTGTAGAAg	ATCAACTTGTAACTTCTCCAATGG	CCATTGGAGAAGTTACAAGTTGAT	GTGGGGGCCTGCCGATTGGATTCTTTCGCGTGTGTGTAGAAgcggccgccgccgccgccgcggcGGAGACGACAACAACTTGCTGGTTTTCAGGTTGGGTTAACGGCATGGAGAACAGTca[c]cccccccaccaccaccaccagcagcccccgccGCAGCCCGGCCCTTCGGGCGAGAGGAGGAACCACCATTGGAGAAGTTACAAGTTGATGATTGACCCGGCTCTGAAAAAGGGGCATCA	cggccgccgccgccgccgcggcGGAGACGACAACAACTTGCTGGTTTTCAGGTTGGGTTAACGGCATGGAGAACAGTca[c]cccccccaccaccaccaccagcagcccccgccGCAGCCCGGCCCTTCGGGCGAGAGGAGGAACCA	121804649	121804841	GATTCTTTCGCGTGTGTGTAGAAGCGGCCGCCGCCGCCGCCGCGGCGGAGACGACAACAACTTGCTGGTTTTCAGGTTGGGTTAACGGCATGGAGAACAGTCACCCCCCCCACCACCACCACCAGCAGCCCCCGCCGCAGCCCGGCCCTTCGGGCGAGAGGAGGAACCACCATTGGAGAAGTTACAAGTTGAT	121804673	121804817
chr12	wnt1	48980565	+	CTCAGAAGGTTCCATCGAATCC	TTGTTGTGAAGGTTCATGAGGAAG	CTTCCTCATGAACCTTCACAACAA	ATCTTCGCTATCACCTCCGCCGGGGTCACCCATTCGGTGGCGCGCTCCTGCTCAGAAGGTTCCATCGAATCCTGCACGTGTGACTACCGGCGGCGCGGCCCCGGGGGCCCCGACTGGCACT[G]GGGGGGCTGCAGCGACAACATTGACTTCGGCCGCCTCTTCGGCCGGGAGTTCGTGGACTCCGGGGAGAAGGGGCGGGACCTGCGCTTCCTCATGAACCTTCACAACAACGAGGCAGGCC	TGCACGTGTGACTACCGGCGGCGCGGCCCCGGGGGCCCCGACTGGCACT[G]GGGGGGCTGCAGCGACAACATTGACTTCGGCCGCCTCTTCGGCCGGGAGTTCGTGGACTCCGGGGAGAAGGGGCGGGACCTGCG	48980494	48980673	CTCAGAAGGTTCCATCGAATCCTGCACGTGTGACTACCGGCGGCGCGGCCCCGGGGGCCCCGACTGGCACTGGGGGGGCTGCAGCGACAACATTGACTTCGGCCGCCTCTTCGGCCGGGAGTTCGTGGACTCCGGGGAGAAGGGGCGGGACCTGCGCTTCCTCATGAACCTTCACAACAA	48980516	48980649
chr13	BRCA2	32332915	+	TTACTTCAGAGAATTCTTTGCCAC	TTTGATaccctgaaatgaagaagc	gcttcttcatttcagggtATCAAA	TTCTTACTTCAGAGAATTCTTTGCCACGTATTTCTAGCCTACCAAAATCAGAGAAGCCATTAAATGAGGAAACAGTGGTAAATAAGAGAGATGAAGAGCAGCATCTTGAATCTCATACAGA[C]TGCATTCTTGCAgtaaagcaggcaatatctggaacttctccagtggcttcttcatttcagggtATCAAAAAGTCTATATTCAGAATAAGAGAATCACCTAAAGAGACTTTCAATGCAAG	GTATTTCTAGCCTACCAAAATCAGAGAAGCCATTAAATGAGGAAACAGTGGTAAATAAGAGAGATGAAGAGCAGCATCTTGAATCTCATACAGA[C]TGCATTCTTGCAgtaaagcaggcaatatctggaacttctccagtg	32332797	32332984	TTACTTCAGAGAATTCTTTGCCACGTATTTCTAGCCTACCAAAATCAGAGAAGCCATTAAATGAGGAAACAGTGGTAAATAAGAGAGATGAAGAGCAGCATCTTGAATCTCATACAGACTGCATTCTTGCAGTAAAGCAGGCAATATCTGGAACTTCTCCAGTGGCTTCTTCATTTCAGGGTATCAAA	32332821	32332960
chr13	BRCA2	32338435	+	AGATAACAAATATACTGCTGCCAG	TTCTTTAATCTGAGTGTTTCCCTC	GAGGGAAACACTCAGATTAAAGAA	AAGATAACAAATATACTGCTGCCAGTAGAAATTCTCATAACTTAGAATTTGATGGCAGTGATTCAAGTAAAAATGATACTGTTTGTATTCATAAAGATGAAACGGACTTGCTATTTACTGA[T]CAGCACAACATATGTCTTAAATTATCTGGCCAGTTTATGAAGGAGGGAAACACTCAGATTAAAGAAGATTTGTCAGATTTAACTTTTTTGGAAGTTGCGAAAGCTCAAGAAGCATGTCA	TAGAAATTCTCATAACTTAGAATTTGATGGCAGTGATTCAAGTAAAAATGATACTGTTTGTATTCATAAAGATGAAACGGACTTGCTATTTACTGA[T]CAGCACAACATATGTCTTAAATTATCTGGCCAGTTTATGAAG	32338315	32338501	AGATAACAAATATACTGCTGCCAGTAGAAATTCTCATAACTTAGAATTTGATGGCAGTGATTCAAGTAAAAATGATACTGTTTGTATTCATAAAGATGAAACGGACTTGCTATTTACTGATCAGCACAACATATGTCTTAAATTATCTGGCCAGTTTATGAAGGAGGGAAACACTCAGATTAAAGAA	32338339	32338477
chr13	EDNRB	77901132	+	TCAACCACGAGTTATCAAATATTTG	TTTTACAAGACAGCAAAAGATTGG	CCAATCTTTTGCTGTCTTGTAAAA	taattatAAATTCAACCACGAGTTATCAAATATTTGTATTTTCTTACCTGCTTTAGGTGATCATTTAAAGCAATCTGCATGCCACTTTTCTTTCTCAACATTTCACAGGTCATTAGTGTAT[A]AAAAAATGCAGTGATGGCCAATGGCAAGCAGAAATAGAAACTGAATAGCCACCAATCTTTTGCTGTCTTGTAAAACTATAGGGATGAGAGAATTTTTACGATTAATACTCCTCTGTAAG	TATTTTCTTACCTGCTTTAGGTGATCATTTAAAGCAATCTGCATGCCACTTTTCTTTCTCAACATTTCACAGGTCATTAGTGTAT[A]AAAAAATGCAGTGATGGCCAATGGCAAGCAGAAATAGAAACTGAATAGCCA	77901022	77901207	TCAACCACGAGTTATCAAATATTTGTATTTTCTTACCTGCTTTAGGTGATCATTTAAAGCAATCTGCATGCCACTTTTCTTTCTCAACATTTCACAGGTCATTAGTGTATAAAAAAATGCAGTGATGGCCAATGGCAAGCAGAAATAGAAACTGAATAGCCACCAATCTTTTGCTGTCTTGTAAAA	77901047	77901183
chr13	EDNRB	77918437	+	CTGTCTCCTTTAGGCACCTC	TGGTTGCGCTGGTTCTTG	CAAGAACCAGCGCAACCA	GGAGATGGTGCGTGGCGGAGATCCTGCCGTCCTGTCTCCTTTAGGCACCTCCGCAGGTGCCAACGACCGCGCCAGACTGGCGTTGGAACCCTTGGGCCATAAGGTCTTAGTGGGTGGCGTC[A]TTATCTCTGCGGTTTGCAAAAGCGGAGTGGCCCTGTCAGGCGGGAAGCCTCTCTCCTCTCCCCAGATCCGCGACAGGCCGCAGGCAAGAACCAGCGCAACCAGGGCGCGTCCGCACAGA	CGCAGGTGCCAACGACCGCGCCAGACTGGCGTTGGAACCCTTGGGCCATAAGGTCTTAGTGGGTGGCGTC[A]TTATCTCTGCGGTTTGCAAAAGCGGAGTGGCCCTGTCAGGCGGGAAGCCTCTCTCCTCTCCCCAGATCCGCGACAGGCCGCAGG	77918347	77918539	CTGTCTCCTTTAGGCACCTCCGCAGGTGCCAACGACCGCGCCAGACTGGCGTTGGAACCCTTGGGCCATAAGGTCTTAGTGGGTGGCGTCATTATCTCTGCGGTTTGCAAAAGCGGAGTGGCCCTGTCAGGCGGGAAGCCTCTCTCCTCTCCCCAGATCCGCGACAGGCCGCAGGCAAGAACCAGCGCAACCA	77918367	77918521
chr14	MDGA2	46957504	+	GATGCTACAGTTATAAACCCCATAG	GATCGAAGTGTCACTATGAGTTG	CAACTCATAGTGACACTTCGATC	GAAAGCTGCATCTCCCAGCTCCAGCTTCATTTATGATGCTACAGTTATAAACCCCATAGTTTTCATTGGAAAGACTCTTCACAGCGTACTCTGTGTATTCCTGAGAGTCAAATTGACCCGT[C]CGTAATAATTTATTGCCCAAGCGCCACTCATAGGTCAGCACCCGTATTGGATAGGCTCTCAGTACTCTGCAACTCATAGTGACACTTCGATCCTGTCCTTGCCGGATTTCCAAGAATGC	TTTTCATTGGAAAGACTCTTCACAGCGTACTCTGTGTATTCCTGAGAGTCAAATTGACCCGT[C]CGTAATAATTTATTGCCCAAGCGCCACTCATAGGTCAGCACCCGTATTGGATAGGCTCTCAGTACTCTG	46957417	46957596	GATGCTACAGTTATAAACCCCATAGTTTTCATTGGAAAGACTCTTCACAGCGTACTCTGTGTATTCCTGAGAGTCAAATTGACCCGTCCGTAATAATTTATTGCCCAAGCGCCACTCATAGGTCAGCACCCGTATTGGATAGGCTCTCAGTACTCTGCAACTCATAGTGACACTTCGATC	46957442	46957573
chr14	MDGA2	47061350	+	TGTGCTGCTGGATATATTAACATC	TAGTTGGTTTAAAAATGGTCGTCC	GGACGACCATTTTTAAACCAACTA	CATAAATATATGCCTCTTACCTGTGCTGCTGGATATATTAACATCGATACTGATATCAGATATTCCTCCTCCCTTCAGAGATGCTACACATGTGTACGTCCCAAAATCCGTGAATTTTAAA[T]CAATGATGTCCAAGTTTGTTGTTCCCGGAGAGACATCAGGATCAGTCTGTGTAATGACCATCCGCTCAGAACTTCTTAATGGACGACCATTTTTAAACCAACTAAATGTTAGCTCCTCA	GATACTGATATCAGATATTCCTCCTCCCTTCAGAGATGCTACACATGTGTACGTCCCAAAATCCGTGAATTTTAAA[T]CAATGATGTCCAAGTTTGTTGTTCCCGGAGAGACATCAGGATCAGTCTGTGTAATGACCATCCGCTCAGAACTTCTTAAT	47061250	47061454	TGTGCTGCTGGATATATTAACATCGATACTGATATCAGATATTCCTCCTCCCTTCAGAGATGCTACACATGTGTACGTCCCAAAATCCGTGAATTTTAAATCAATGATGTCCAAGTTTGTTGTTCCCGGAGAGACATCAGGATCAGTCTGTGTAATGACCATCCGCTCAGAACTTCTTAATGGACGACCATTTTTAAACCAACTA	47061274	47061430
chr14	MDGA2	47061568	+	CAGAACTTCTTAATGGACGACC	ATGAAAGTAACACTAACTCCTTATGG	CCATAAGGAGTTAGTGTTACTTTCAT	GCTCAGAACTTCTTAATGGACGACCATTTTTAAACCAACTAAATGTTAGCTCCTCAGAAGGAACAGCTTCTACTTGGCAAGATATTTTCACCTCACGGCCAATCTGGATGTTGTCATCTTTGTGATAAGGATCTGGTGTGATCCAAAATCGTCCTTTTTTTAATGCTACAACATAAAAATTCCATAAGGAGTTAGTGTTACTTTCATAACTTTAAGGATTCATTAACTGTAGATAATCATCTCTGAGCTGAAATAAAGTAAAACCAAATAAAGT	ATTTTTAAACCAACTAAATGTTAGCTCCTCAGAAGGAACAGCTTCTACTTGGCAAGATATTTTCACCTCACGGCCAATCTGGATGTTGTCATCTTTGTGATAAGGATCTGGTGTGATCCAAAATCGTCCTTTTTTTAATGCTACAACATAAAAATT	47061417	47061620	CAGAACTTCTTAATGGACGACCATTTTTAAACCAACTAAATGTTAGCTCCTCAGAAGGAACAGCTTCTACTTGGCAAGATATTTTCACCTCACGGCCAATCTGGATGTTGTCATCTTTGTGATAAGGATCTGGTGTGATCCAAAATCGTCCTTTTTTTAATGCTACAACATAAAAATTCCATAAGGAGTTAGTGTTACTTTCAT	47061439	47061594
chr16	CDH11	64950900	+	GATGCAGGCGAGGATGG	GTACCTTCTGCCCATAGTGATC	GATCACTATGGGCAGAAGGTAC	CGATGCAGGCGAGGATGGCGATCAGGGCGCCTGTGCTCAGGCCGGCGTTCAGAATGTAGGCCTCTGCGTTGCAGGAGAGCAGTGCCCCGTTCACGTCGCACCCGCAGACTTTGATGGTGAG[G]GTGTTGGTGCTACTCATGGGCGGGATGCCGCCATCGCTGATCACTATGGGCAGAAGGTACAAGTCCTGCTTCTGCCGACTGAACCCTCCACGCCGGGCGTACACGCCTGCTGTGTTATC	CGATCAGGGCGCCTGTGCTCAGGCCGGCGTTCAGAATGTAGGCCTCTGCGTTGCAGGAGAGCAGTGCCCCGTTCACGTCGCACCCGCAGACTTTGATGGTGAG[G]GTGTTGGTGCTACTCATGGGCGGGATGCCGCCATCGCT	64950780	64950960	GATGCAGGCGAGGATGGCGATCAGGGCGCCTGTGCTCAGGCCGGCGTTCAGAATGTAGGCCTCTGCGTTGCAGGAGAGCAGTGCCCCGTTCACGTCGCACCCGCAGACTTTGATGGTGAGGGTGTTGGTGCTACTCATGGGCGGGATGCCGCCATCGCTGATCACTATGGGCAGAAGGTAC	64950797	64950938
chr16	CDH11	64982175	+	CAGCTGCATTTTCTTGGACTTC	TTTGAAACCAAAAGAGCCTATAGC	GCTATAGGCTCTTTTGGTTTCAAA	GGGCTGTTGGCAGCATCAGGGTCTTTGGCATGCACTCTCCCAACCACGGTGCCAGCAGCTGCATTTTCTTGGACTTCGTGGATGTAACTTGGGGCCAAGAACATAGGGGGCTCATCAGCAT[C]TTCTACTGAGATCTTGACGGTCACAGTGTCCTTGAAAGGGCCATTGCTGATAAACTTCGGGTCGATGTGCACGTTGGCTGCCTCTACCTTCAAGCTATAGGCTCTTTTGGTTTCAAAAT	GTGGATGTAACTTGGGGCCAAGAACATAGGGGGCTCATCAGCAT[C]TTCTACTGAGATCTTGACGGTCACAGTGTCCTTGAAAGGGCCATTGCTGATAAACTTCGGGTCGATGTGCACGTTGGCTGCCTCTACCTTCAA	64982109	64982292	CAGCTGCATTTTCTTGGACTTCGTGGATGTAACTTGGGGCCAAGAACATAGGGGGCTCATCAGCATCTTCTACTGAGATCTTGACGGTCACAGTGTCCTTGAAAGGGCCATTGCTGATAAACTTCGGGTCGATGTGCACGTTGGCTGCCTCTACCTTCAAGCTATAGGCTCTTTTGGTTTCAAA	64982131	64982268
chr16	CREBBP	3767800	+	TAAGGTAATGAATAAATGGCCTAC	AGCTTCCCAAGTTAAAGAAGAAAC	GTTTCTTCTTTAACTTGGGAAGCT	AAAGCAGCATGCTTTAATAAGGTAATGAATAAATGGCCTACTTTTTTTGCGCGGCTGCGAAGGAGATGTTGACTGAGAGGCTGTGCCGTTactgctactctcttcttcctctttaacttct[a]ctttcacttcaggtttcttttcatccacttccaTTGGTTCTGATTTCTGCTCTGCTATGTCTGTTTCTTCTTTAACTTGGGAAGCTCCTTGCAAATCCTCCTCCATCATCTTGAGAAAA	TTTTTTTGCGCGGCTGCGAAGGAGATGTTGACTGAGAGGCTGTGCCGTTactgctactctcttcttcctctttaacttct[a]ctttcacttcaggtttcttttcatccacttccaTTGGTTCTGATTTCTGCTCTGCTATGTCT	3767696	3767886	TAAGGTAATGAATAAATGGCCTACTTTTTTTGCGCGGCTGCGAAGGAGATGTTGACTGAGAGGCTGTGCCGTTACTGCTACTCTCTTCTTCCTCTTTAACTTCTACTTTCACTTCAGGTTTCTTTTCATCCACTTCCATTGGTTCTGATTTCTGCTCTGCTATGTCTGTTTCTTCTTTAACTTGGGAAGCT	3767720	3767862
chr16	CTCF	67611400	+	GAAGGGTTTCAGGTGGTTAAAG	CTCAAAATCGTAGACAGACACATC	GATGTGTCTGTCTACGATTTTGAG	AAGTGAACCCATGATATGCCACACCCTACCTTTGCCTGAAGGGTTTCAGGTGGTTAAAGTGGGGGCCAATGGAGAGGTGGAGACACTAGAACAAGGGGAACTTCCACCCCAGGAAGATCCT[A]GTTGGCAAAAAGACCCAGACTATCAGCCACCAGCCAAAAAAACAAAGAAAACCAAAAAGAGCAAACTGCGTTATACAGAGGAGGGCAAAGATGTAGATGTGTCTGTCTACGATTTTGAG	TGGGGGCCAATGGAGAGGTGGAGACACTAGAACAAGGGGAACTTCCACCCCAGGAAGATCCT[A]GTTGGCAAAAAGACCCAGACTATCAGCCACCAGCCAAAAAAACAAAGAAAACCAAAAAGAGCAAACTGCGTTATACAGAGGAGGGCAAAGATGTA	67611316	67611519	GAAGGGTTTCAGGTGGTTAAAGTGGGGGCCAATGGAGAGGTGGAGACACTAGAACAAGGGGAACTTCCACCCCAGGAAGATCCTAGTTGGCAAAAAGACCCAGACTATCAGCCACCAGCCAAAAAAACAAAGAAAACCAAAAAGAGCAAACTGCGTTATACAGAGGAGGGCAAAGATGTAGATGTGTCTGTCTACGATTTTGAG	67611338	67611495
chr16	CTCF	67620739	+	GAAGTTAAAGTTCGGTTGTTTTCG	AATACAGTAAGGAGTGGAGAAGTC	GACTTCTCCACTCCTTACTGTATT	GCTTTTGTGCCTAACCTACTGTGCTCTTGTTACAGTCTGTGTTAACAGAAGTTAAAGTTCGGTTGTTTTCGTATTTCAGGTCAGCAAATTAAAACGTCACATTCGCTCTCATACTGGAGAG[C]GTCCGTTTCAGTGCAGTTTGTGCAGTTATGCCAGCAGGGACACATACAAGCTGAAAAGGCACATGAGAACCCATTCAGGTAGGACTTCTCCACTCCTTACTGTATTAATGAGCTTCTTT	TATTTCAGGTCAGCAAATTAAAACGTCACATTCGCTCTCATACTGGAGAG[C]GTCCGTTTCAGTGCAGTTTGTGCAGTTATGCCAGCAGGGACACATACAAGCTGAAAAGGCACATGAGAACCCATTCAGGTAG	67620665	67620845	GAAGTTAAAGTTCGGTTGTTTTCGTATTTCAGGTCAGCAAATTAAAACGTCACATTCGCTCTCATACTGGAGAGCGTCCGTTTCAGTGCAGTTTGTGCAGTTATGCCAGCAGGGACACATACAAGCTGAAAAGGCACATGAGAACCCATTCAGGTAGGACTTCTCCACTCCTTACTGTATT	67620689	67620821
chr16	CTCF	67621520	+	TCTTTAAAGGGGAAAAGCCTTATG	TCTCACTAGTTAATCTACTTACCC	GGGTAAGTAGATTAACTAGTGAGA	TTATTCATTTCATTTATGTGTTCATTCTGTATTTTCTTTAAAGGGGAAAAGCCTTATGAATGTTATATTTGTCATGCTCGGTTTACCCAAAGTGGTACCATGAAGATGCACATTTTACAGA[A]GCACACAGAAAATGTGGCCAAATTTCACTGTCCCCACTGTGACACAGTCATAGCCCGAAAAAGTGATTTGGGTAAGTAGATTAACTAGTGAGAAGTGAAAAAAATATTTTGAAGGATTT	AATGTTATATTTGTCATGCTCGGTTTACCCAAAGTGGTACCATGAAGATGCACATTTTACAGA[A]GCACACAGAAAATGTGGCCAAATTTCACTGTCCCCACTGTGACACAGTCATAGCCCGAAAAAGTGATTT	67621433	67621613	TCTTTAAAGGGGAAAAGCCTTATGAATGTTATATTTGTCATGCTCGGTTTACCCAAAGTGGTACCATGAAGATGCACATTTTACAGAAGCACACAGAAAATGTGGCCAAATTTCACTGTCCCCACTGTGACACAGTCATAGCCCGAAAAAGTGATTTGGGTAAGTAGATTAACTAGTGAGA	67621457	67621589
chr16	ZFHX3	72787980	+	AGACCAACTTGTACTGCACCTTTG	CTCCTTCCCCAGACAAAGAC	GTCTTTGTCTGGGGAAGGAG	CCGCCTGGCACTTGCGGCAGACCAACTTGTACTGCACCTTTGGAACAATGAAGGGGTCGTAGAGGGAGTCCGCACTTTTGCTTTCTGCTTCTGGCTCTTCAGGGAGTTTCGGCAGGAGGGG[G]GACACCTCACGGGGGGTGTTTTTCTGTTCTTCTGGTTTGGGGGATTCTTTGGCAGGGTCTTTGTCTGGGGAAGGAGCCCCGGGGGGGACTGGGGTTTGGCTTGCTTTGGgctgctgctg	GAACAATGAAGGGGTCGTAGAGGGAGTCCGCACTTTTGCTTTCTGCTTCTGGCTCTTCAGGGAGTTTCGGCAGGAGGGG[G]GACACCTCACGGGGGGTGTTTTTCTGTTCTTCTGGTTTGGGGGATTCTTTGGCAGG	72787877	72788056	AGACCAACTTGTACTGCACCTTTGGAACAATGAAGGGGTCGTAGAGGGAGTCCGCACTTTTGCTTTCTGCTTCTGGCTCTTCAGGGAGTTTCGGCAGGAGGGGGGACACCTCACGGGGGGTGTTTTTCTGTTCTTCTGGTTTGGGGGATTCTTTGGCAGGGTCTTTGTCTGGGGAAGGAG	72787901	72788036
chr16	ZFHX3	72797004	+	CTTTCTTCTCTTTGGCCTTCAAG	agcagAACCAACTCTCTATAGC	GCTATAGAGAGTTGGTTctgct	AGGGAGCATGGAAGGCTCAGAACCACCCCCTGGTGCCAACTCTTTCTTCTCTTTGGCCTTCAAGGCATCTGGCAGTGTTTCCTTCGGACCGGTGTTGCCCTCTCCCCCCTCGGCGCTGTCC[C]TCTCTCTCTGGCTTTCTTTTTCCTTTTCTTTGATGACCAATTTGTTCTTCTTTTCGGGGTGCTGGCTTGGCTGAAGGAGGGCAGAGTGACTCTGGGCTATAGAGAGTTGGTTctgctgc	GCATCTGGCAGTGTTTCCTTCGGACCGGTGTTGCCCTCTCCCCCCTCGGCGCTGTCC[C]TCTCTCTCTGGCTTTCTTTTTCCTTTTCTTTGATGACCAATTTGTTCTTCTTTTCGGGGTGCTGGCTTGGCTGAAGGAGGGCAGAGTGACTCTGG	72796924	72797121	CTTTCTTCTCTTTGGCCTTCAAGGCATCTGGCAGTGTTTCCTTCGGACCGGTGTTGCCCTCTCCCCCCTCGGCGCTGTCCCTCTCTCTCTGGCTTTCTTTTTCCTTTTCTTTGATGACCAATTTGTTCTTCTTTTCGGGGTGCTGGCTTGGCTGAAGGAGGGCAGAGTGACTCTGGGCTATAGAGAGTTGGTTCTGCT	72796947	72797099
chr16	ZFHX3	72957938	+	CCTCCATTCTGCAGGTTCTG	CTCCTGTGTCTACTGCAAAAG	CTTTTGCAGTAGACACAGGAG	ccgccgccgccgccgccCCGGCAGTGTGGCTGAAGACCTGCTCCCCCCCTCCATTCTGCAGGTTCTGCATGTTGTTGAGATGCTTGTCAGACTGCATATGAATACTGAGGTTGCCTTTGGT[A]GTTGTGGAGTAGTTACACACCTCGCAGCGGAAAGGCTTGTAACCACACGTGTAGCTCTCGCCTCGTGCCAGCCGGGGGTGGGGCTGCCCGCTTTTGCAGTAGACACAGGAGCCCCCCGG	CATGTTGTTGAGATGCTTGTCAGACTGCATATGAATACTGAGGTTGCCTTTGGT[A]GTTGTGGAGTAGTTACACACCTCGCAGCGGAAAGGCTTGTAACCACACGTGTAGCTCTCGCCTCGTGCCAGCCGGGGGTGGGGCTGCCCG	72957864	72958049	CCTCCATTCTGCAGGTTCTGCATGTTGTTGAGATGCTTGTCAGACTGCATATGAATACTGAGGTTGCCTTTGGTAGTTGTGGAGTAGTTACACACCTCGCAGCGGAAAGGCTTGTAACCACACGTGTAGCTCTCGCCTCGTGCCAGCCGGGGGTGGGGCTGCCCGCTTTTGCAGTAGACACAGGAG	72957884	72958028
chr17	RNF43	58357800	+	AGGGGTGTGCCTCTGG	CAGTCTGTTCAACTTGCAAAAATC	GATTTTTGCAAGTTGAACAGACTG	CAAGGGGTGTGCCTCTGGGGACCAAGGATATGCCACACTGGGGGTGTAATGGGGAAAAATCTGGCAAGCTGGGTGCACAGTTGCATCCTGGGGCCGAGAGCCAGGGGTGGGCTCGGAGGGA[C]CCCCCCGCCTTTTCCTCTGTGGGTGTCGGGCAGAGAGGCTGGATTTTTGCAAGTTGAACAGACTGCTGGTACTGGGGCAGATGCTGGAGGCGTCAACTGGGCCAGGGGCTGGCTCAGGG	GGACCAAGGATATGCCACACTGGGGGTGTAATGGGGAAAAATCTGGCAAGCTGGGTGCACAGTTGCATCCTGGGGCCGAGAGCCAGGGGTGGGCTCGGAGGGA[C]CCCCCCGCCTTTTCCTCTGTGGGTGTCGGGCAGAGAGGCTG	58357681	58357865	AGGGGTGTGCCTCTGGGGACCAAGGATATGCCACACTGGGGGTGTAATGGGGAAAAATCTGGCAAGCTGGGTGCACAGTTGCATCCTGGGGCCGAGAGCCAGGGGTGGGCTCGGAGGGACCCCCCCGCCTTTTCCTCTGTGGGTGTCGGGCAGAGAGGCTGGATTTTTGCAAGTTGAACAGACTG	58357697	58357841
chr17	TP53	7670685	+	AGGAAGGCAGGGGAGTAG	acttgaaccatcttttaactcagg	cctgagttaaaagatggttcaagt	AGGAAGGCAGGGGAGTAGGGCCAGGAAGGGGCTGAGGTCACTCACCTGGAGTGAGCCCTGCTCCCCCCTGGCTCCTTCCCAGCCTGGGCATCCTTGAGTTCCAAGGCCTCATTCAGCTCTC[G]GAACATCTCGAAGCGCTCACGCCCACGGATCTGCAGCAACAGAGGAGGGGGAGAAGTAAGTATATACacagtacctgagttaaaagatggttcaagttacaattgtttgactttatgac	GGCCAGGAAGGGGCTGAGGTCACTCACCTGGAGTGAGCCCTGCTCCCCCCTGGCTCCTTCCCAGCCTGGGCATCCTTGAGTTCCAAGGCCTCATTCAGCTCTC[G]GAACATCTCGAAGCGCTCACGCCCACGGATCTGCAGCAACAGAGGAGGGGGAGAAGTAAGTATATACacagta	7670564	7670782	AGGAAGGCAGGGGAGTAGGGCCAGGAAGGGGCTGAGGTCACTCACCTGGAGTGAGCCCTGCTCCCCCCTGGCTCCTTCCCAGCCTGGGCATCCTTGAGTTCCAAGGCCTCATTCAGCTCTCGGAACATCTCGAAGCGCTCACGCCCACGGATCTGCAGCAACAGAGGAGGGGGAGAAGTAAGTATATACACAGTACCTGAGTTAAAAGATGGTTCAAGT	7670582	7670758
chr17	TP53	7673776	+	CTTCTTGTCCTGCTTGCTTAC	TCTCTTTTCCTATCCTGAGTAGTG	CACTACTCAGGATAGGAAAAGAGA	ACTGCACCCTTGGTCTCCTCCACCGCTTCTTGTCCTGCTTGCTTACCTCGCTTAGTGCTCCCTGGGGGCAGCTCGTGGTGAGGCTCCCCTTTCTTGCGGAGATTCTCTTCCTCTGTGCGCC[G]GTCTCTCCCAGGACAGGCACAAACACGCACCTCAAAGCTGTTCCGTCCCAGTAGATTACCACTACTCAGGATAGGAAAAGAGAAGCAAGAGGCAGTAAGGAAATCAGGTCCTACCTGTC	CTCGCTTAGTGCTCCCTGGGGGCAGCTCGTGGTGAGGCTCCCCTTTCTTGCGGAGATTCTCTTCCTCTGTGCGCC[G]GTCTCTCCCAGGACAGGCACAAACACGCACCTCAAAGCTGTTCCGTCCCAGTAGATTAC	7673680	7673859	CTTCTTGTCCTGCTTGCTTACCTCGCTTAGTGCTCCCTGGGGGCAGCTCGTGGTGAGGCTCCCCTTTCTTGCGGAGATTCTCTTCCTCTGTGCGCCGGTCTCTCCCAGGACAGGCACAAACACGCACCTCAAAGCTGTTCCGTCCCAGTAGATTACCACTACTCAGGATAGGAAAAGAGA	7673701	7673835
chr17	TP53	7674252	+	AGTCTTCCAGTGTGATGATGG	aaaaaGGCCTCCCCTGCTTG	CAAGCAGGGGAGGCCttttt	GAGGCTGGGGCACAGCAGGCCAGTGTGCAGGGTGGCAAGTGGCTCCTGACCTGGAGTCTTCCAGTGTGATGATGGTGAGGATGGGCCTCCGGTTCATGCCGCCCATGCAGGAACTGTTACA[C]ATGTAGTTGTAGTGGATGGTGGTACAGTCAGAGCCAACCTAGGAGATAACACAGGCCCAAGATGAGGCCAGTGCGCCTTGGGGAGACCTGTGGCAAGCAGGGGAGGCCttttttttttt	TGAGGATGGGCCTCCGGTTCATGCCGCCCATGCAGGAACTGTTACA[C]ATGTAGTTGTAGTGGATGGTGGTACAGTCAGAGCCAACCTAGGAGATAACACAGGCCCAAGATGAGGCCAGTGCGCCTTGGGGAGACCTGTGG	7674185	7674365	AGTCTTCCAGTGTGATGATGGTGAGGATGGGCCTCCGGTTCATGCCGCCCATGCAGGAACTGTTACACATGTAGTTGTAGTGGATGGTGGTACAGTCAGAGCCAACCTAGGAGATAACACAGGCCCAAGATGAGGCCAGTGCGCCTTGGGGAGACCTGTGGCAAGCAGGGGAGGCCTTTTT	7674206	7674345
chr17	TP53	7674900	+	ACTGACAACCACCCTTAACC	TGATTCCTCACTGATTGCTCTTAG	CTAAGAGCAATCAGTGAGGAATCA	GCCCCCCTACTGCTCACCTGGAGGGCCACTGACAACCACCCTTAACCCCTCCTCCCAGAGACCCCAGTTGCAAACCAGACCTCAGGCGGCTCATAGGGCACCACCACACTATGTCGAAAAG[T]GTTTCTGTCATCCAAATACTCCACACGCAAATTTCCTTCCACTCGGATAAGATGCTGAGGAGGGGCCAGACCTAAGAGCAATCAGTGAGGAATCAGAGGCCTGGGGACCCTGGGCAACC	CCTCCTCCCAGAGACCCCAGTTGCAAACCAGACCTCAGGCGGCTCATAGGGCACCACCACACTATGTCGAAAAG[T]GTTTCTGTCATCCAAATACTCCACACGCAAATTTCCTTCCACTCGGATAAGATGCTGAGGAGGGGCCAGAC	7674806	7674995	ACTGACAACCACCCTTAACCCCTCCTCCCAGAGACCCCAGTTGCAAACCAGACCTCAGGCGGCTCATAGGGCACCACCACACTATGTCGAAAAGTGTTTCTGTCATCCAAATACTCCACACGCAAATTTCCTTCCACTCGGATAAGATGCTGAGGAGGGGCCAGACCTAAGAGCAATCAGTGAGGAATCA	7674826	7674971
chr17	TP53	7675145	+	GCTCACCATCGCTATCTGAG	CTCCTTCCTCTTCCTACAGTACTC	GAGTACTGTAGGAAGAGGAAGGAG	CTGTCGTCTCTCCAGCCCCAGCTGCTCACCATCGCTATCTGAGCAGCGCTCATGGTGGGGGCAGCGCCTCACAACCTCCGTCATGTGCTGTGACTGCTTGTAGATGGCCATGGCGCGGACG[C]GGGTGCCGGGCGGGGGTGTGGAATCAACCCACAGCTGCACAGGGCAGGTCTTGGCCAGTTGGCAAAACATCTTGTTGAGGGCAGGGGAGTACTGTAGGAAGAGGAAGGAGACAGAGTTG	CAGCGCTCATGGTGGGGGCAGCGCCTCACAACCTCCGTCATGTGCTGTGACTGCTTGTAGATGGCCATGGCGCGGACG[C]GGGTGCCGGGCGGGGGTGTGGAATCAACCCACAGCTGCACAGGGCAGGTCTTGGCCAGTTGGCAAAACATCTTGTTGAGGGCAGGG	7675047	7675255	GCTCACCATCGCTATCTGAGCAGCGCTCATGGTGGGGGCAGCGCCTCACAACCTCCGTCATGTGCTGTGACTGCTTGTAGATGGCCATGGCGCGGACGCGGGTGCCGGGCGGGGGTGTGGAATCAACCCACAGCTGCACAGGGCAGGTCTTGGCCAGTTGGCAAAACATCTTGTTGAGGGCAGGGGAGTACTGTAGGAAGAGGAAGGAG	7675067	7675231
chr18	SMAD4	51065521	+	TTTCCTATAGCTCCTGAGTATTGG	AATCAATACCTTGCTCTCTCAATG	CATTGAGAGAGCAAGGTATTGATT	TCTTTCCCATTTATTTCCTATAGCTCCTGAGTATTGGTGTTCCATTGCTTACTTTGAAATGGATGTTCAGGTAGGAGAGACATTTAAGGTTCCTTCAAGCTGCCCTATTGTTACTGTTGAT[G]GATACGTGGACCCTTCTGGAGGAGATCGCTTTTGTTTGGGTCAACTCTCCAATGTCCACAGGACAGAAGCCATTGAGAGAGCAAGGTATTGATTGTATAGTCAGATAGTTACTTTAAAA	TGTTCCATTGCTTACTTTGAAATGGATGTTCAGGTAGGAGAGACATTTAAGGTTCCTTCAAGCTGCCCTATTGTTACTGTTGAT[G]GATACGTGGACCCTTCTGGAGGAGATCGCTTTTGTTTGGGTCAACTCTCCAATGTCCACAGGACAGAAGC	51065413	51065615	TTTCCTATAGCTCCTGAGTATTGGTGTTCCATTGCTTACTTTGAAATGGATGTTCAGGTAGGAGAGACATTTAAGGTTCCTTCAAGCTGCCCTATTGTTACTGTTGATGGATACGTGGACCCTTCTGGAGGAGATCGCTTTTGTTTGGGTCAACTCTCCAATGTCCACAGGACAGAAGCCATTGAGAGAGCAAGGTATTGATT	51065437	51065591
chr18	SMAD4	51078380	+	GGAATTGGTGTTGATGACCTTC	CTCAGTCTAAAGGTTGTGGGTC	GACCCACAACCTTTAGACTGAG	TGTCAGCTGCTGCTGGAATTGGTGTTGATGACCTTCGTCGCTTATGCATACTCAGGATGAGTTTTGTGAAAGGCTGGGGACCGGATTACCCAAGACAGAGCATCAAAGAAACACCTTGCTG[G]ATTGAAATTCACTTACACCGGGCCCTCCAGCTCCTAGACGAAGTACTTCATACCATGCCGATTGCAGACCCACAACCTTTAGACTGAGGTCTTTTACCGTTGGGGCCCTTAACCTTATC	GTCGCTTATGCATACTCAGGATGAGTTTTGTGAAAGGCTGGGGACCGGATTACCCAAGACAGAGCATCAAAGAAACACCTTGCTG[G]ATTGAAATTCACTTACACCGGGCCCTCCAGCTCCTAGACGAAGTACTTCATACCATGCCGATTGCA	51078273	51078468	GGAATTGGTGTTGATGACCTTCGTCGCTTATGCATACTCAGGATGAGTTTTGTGAAAGGCTGGGGACCGGATTACCCAAGACAGAGCATCAAAGAAACACCTTGCTGGATTGAAATTCACTTACACCGGGCCCTCCAGCTCCTAGACGAAGTACTTCATACCATGCCGATTGCAGACCCACAACCTTTAGACTGAG	51078295	51078446
chr19	DAZAP1	1430255	+	GCAGGCCTGGGTCTAACTG	GGCACCGTAGCCCTGAG	CTCAGGGCTACGGTGCC	TAGGGCCCCTGGCAGGCCTGGGTCTAACTGTGGCCAGTCTGTGTTGTCCAGCGCTCTCTGTCCATCACCCCCGTACTGTGTGTTTCAGGTGGCTATGGACCGCCCCCTGCAGGAAGAGGAG[C]CCCCCCGCCACCCCCACCGTTCACCTCCTACATCGTGTCCACCCCTCCTGGAGGCTTTCCCCCTCCCCAGGGCTTCCCTCAGGGCTACGGTGCCCCGCCACAGTTCAGTAAGTCTAGGG	TGGCCAGTCTGTGTTGTCCAGCGCTCTCTGTCCATCACCCCCGTACTGTGTGTTTCAGGTGGCTATGGACCGCCCCCTGCAGGAAGAGGAG[C]CCCCCCGCCACCCCCACCGTTCACCTCCTACATCGTGTCCACCCCTCCTGGAGGCTTTCCCCCTCCCCAGGGCTTCC	1430145	1430349	GCAGGCCTGGGTCTAACTGTGGCCAGTCTGTGTTGTCCAGCGCTCTCTGTCCATCACCCCCGTACTGTGTGTTTCAGGTGGCTATGGACCGCCCCCTGCAGGAAGAGGAGCCCCCCCGCCACCCCCACCGTTCACCTCCTACATCGTGTCCACCCCTCCTGGAGGCTTTCCCCCTCCCCAGGGCTTCCCTCAGGGCTACGGTGCC	1430164	1430332
chr19	KMT2B	35719890	+	TATTCTCCTTTTAGGTCGAGCG	GTGGAGGGCTCACATGC	GCATGTGAGCCCTCCAC	CTATTCTCCTTTTAGGTCGAGCGCCCCGAGGTCGGGGTCGCAAGCATAAGACGACCCCCCTTCCTCCTCCTCGCCTAGCAGATGTGGCTCCTACCCCCCCAAAGACCCCTGCCCGGAAACG[G]GGTGAGGAAGGCACAGAACGGATGGTGCAGGCACTGACTGAACTTCTCCGGCGGGCCCAGGCACCCCAAGCACCCCGGAGCCGGGCATGTGAGCCCTCCACCCCCCGGCGGTCTCGGGG	CCCCGAGGTCGGGGTCGCAAGCATAAGACGACCCCCCTTCCTCCTCCTCGCCTAGCAGATGTGGCTCCTACCCCCCCAAAGACCCCTGCCCGGAAACG[G]GGTGAGGAAGGCACAGAACGGATGGTGCAGGCACTGACTGAACTTCTCCGGCGGGCCCAGGCACCCCAAGCACCCCGGAGCCGG	35719770	35719991	TATTCTCCTTTTAGGTCGAGCGCCCCGAGGTCGGGGTCGCAAGCATAAGACGACCCCCCTTCCTCCTCCTCGCCTAGCAGATGTGGCTCCTACCCCCCCAAAGACCCCTGCCCGGAAACGGGGTGAGGAAGGCACAGAACGGATGGTGCAGGCACTGACTGAACTTCTCCGGCGGGCCCAGGCACCCCAAGCACCCCGGAGCCGGGCATGTGAGCCCTCCAC	35719792	35719974
chr19	KMT2B	35732175	+	GAATCAAAGTGCCCAACTACTC	GTGGTGGGTCAGTGAAGATG	CATCTTCACTGACCCACCAC	GGGGCTCGAATCAAAGTGCCCAACTACTCGCCATCCCGGAGGCCCTTGGGGGGTGTCTCCTTTGGCCCCCTGCCCTCCCCTGGTGAGCACCGGGCATGTGGGGGTTGGGGGTGGAGCCGCG[G]AGGTGGGAGCTGCTGGTAACACCAACCCTCCCCCCACAGGAAGTCCATCTTCACTGACCCACCACATCCCCACAGTGGGAGACCCGGACTTCCCAGCTCCCCCCAGACGTTCCCGTCGT	GCCATCCCGGAGGCCCTTGGGGGGTGTCTCCTTTGGCCCCCTGCCCTCCCCTGGTGAGCACCGGGCATGTGGGGGTTGGGGGTGGAGCCGCG[G]AGGTGGGAGCTGCTGGTAACACCAACCCTCCCCCCACAGGAAGTC	35732061	35732240	GAATCAAAGTGCCCAACTACTCGCCATCCCGGAGGCCCTTGGGGGGTGTCTCCTTTGGCCCCCTGCCCTCCCCTGGTGAGCACCGGGCATGTGGGGGTTGGGGGTGGAGCCGCGGAGGTGGGAGCTGCTGGTAACACCAACCCTCCCCCCACAGGAAGTCCATCTTCACTGACCCACCAC	35732083	35732220
chr19	PPP2R1A	52212750	+	cttgctcctctctgccatac	GAACATGGGGATGATCTCACTC	GAGTGAGATCATCCCCATGTTC	cttgctcctctctgccatactgCCTGCTGCCTCAGGATCCCCGTCCCCGACTCCCAGGTACTTCCGGAACCTGTGCTCAGATGACACCCCCATGGTGCGGCGGGCCGCAGCCTCCAAGCTG[G]GGGAGTTTGCCAAGGTGCTGGAGCTGGACAACGTCAAGAGTGAGATCATCCCCATGTTCTCCAACCTGGCCTCTGACGAGCAGGTGAGTTTTGCTTCCTGGCCCTCTGCTCTCCCGTCC	tgCCTGCTGCCTCAGGATCCCCGTCCCCGACTCCCAGGTACTTCCGGAACCTGTGCTCAGATGACACCCCCATGGTGCGGCGGGCCGCAGCCTCCAAGCTG[G]GGGAGTTTGCCAAGGTGCTGGAGCTGGACAACGTCAA	52212629	52212809	CTTGCTCCTCTCTGCCATACTGCCTGCTGCCTCAGGATCCCCGTCCCCGACTCCCAGGTACTTCCGGAACCTGTGCTCAGATGACACCCCCATGGTGCGGCGGGCCGCAGCCTCCAAGCTGGGGGAGTTTGCCAAGGTGCTGGAGCTGGACAACGTCAAGAGTGAGATCATCCCCATGTTC	52212649	52212787
chr19	PPP2R1A	52213013	+	CTGTTCCTCTCCTCTCCCTAG	CTCATCTACCTCTGTGAACTTGTC	GACAAGTTCACAGAGGTAGATGAG	AAGAGAATCCCAGAGCTCAGCAAGGCCTCTGCTGCCCTCCCACTGTTCCTCTCCTCTCCCTAGGACTCGGTGCGGCTGCTGGCGGTGGAGGCGTGCGTGAACATCGCCCAGCTTCTGCCCC[A]GGAGGATCTGGAGGCCCTGGTGATGCCCACTCTGCGCCAGGCCGCTGAAGACAAGTCCTGGCGCGTCCGCTACATGGTGGCTGACAAGTTCACAGAGGTAGATGAGCGACCGTTGACAT	GACTCGGTGCGGCTGCTGGCGGTGGAGGCGTGCGTGAACATCGCCCAGCTTCTGCCCC[A]GGAGGATCTGGAGGCCCTGGTGATGCCCACTCTGCGCCAGGCCGCTGAAGACAAGTCCTGGCGCGTCCGCTACATGGTGGCT	52212934	52213119	CTGTTCCTCTCCTCTCCCTAGGACTCGGTGCGGCTGCTGGCGGTGGAGGCGTGCGTGAACATCGCCCAGCTTCTGCCCCAGGAGGATCTGGAGGCCCTGGTGATGCCCACTCTGCGCCAGGCCGCTGAAGACAAGTCCTGGCGCGTCCGCTACATGGTGGCTGACAAGTTCACAGAGGTAGATGAG	52212955	52213095
chr19	TEAD2	49347216	+	CCCGCGACAGATTCTCTC	CAGATCTACGACAAATTCCCTGAG	CTCAGGGAATTTGTCGTAGATCTG	TGGTAGGGCCCGCGACAGATTCTCTCAGGGCCAGAGGCCTTTGCTGGGACACCACAGGATTTGTGAGCACTTTTGATTTTGCTGTGAGAACTCACCCAGAACTTGACCAGGAAGAAGGCAT[G]GGGGGGGCCACGATCATATAGCTCTCGGAGGCCACCCTTTTTCTCAGGGAATTTGTCGTAGATCTGCCGGACGTCCACACTCTCGAGCGGCGGCGCTCCGGGGCTGGGGCAGTGCTGGC	AGGGCCAGAGGCCTTTGCTGGGACACCACAGGATTTGTGAGCACTTTTGATTTTGCTGTGAGAACTCACCCAGAACTTGACCAGGAAGAAGGCAT[G]GGGGGGGCCACGATCATATAGCTCTCGGAGGCCACCCTTTTT	49347103	49347282	CCCGCGACAGATTCTCTCAGGGCCAGAGGCCTTTGCTGGGACACCACAGGATTTGTGAGCACTTTTGATTTTGCTGTGAGAACTCACCCAGAACTTGACCAGGAAGAAGGCATGGGGGGGGCCACGATCATATAGCTCTCGGAGGCCACCCTTTTTCTCAGGGAATTTGTCGTAGATCTG	49347121	49347258
chr2	BMPR2	201518938	+	cttaatgaaggccatggtttcc	ttgtgttatatgctggatcatctc	gagatgatccagcatataacacaa	ggtccttaatgaaggccatggtttccctttgtcctcctaggattctgcaaatttttttattgagccatctggaaggggacatggagacaggcaagtagtaatttgtatgtcacactagcac[t]tctttacacatgactcttccaatcattctgatgtttatgtaatggagatgatccagcatataacacaataactcctcatatacattcagatgtaggaacaaccacagttgttgttaggt	ctttgtcctcctaggattctgcaaatttttttattgagccatctggaaggggacatggagacaggcaagtagtaatttgtatgtcacactagcac[t]tctttacacatgactcttccaatcattctgatgtttatgtaatg	201518821	201519006	CTTAATGAAGGCCATGGTTTCCCTTTGTCCTCCTAGGATTCTGCAAATTTTTTTATTGAGCCATCTGGAAGGGGACATGGAGACAGGCAAGTAGTAATTTGTATGTCACACTAGCACTTCTTTACACATGACTCTTCCAATCATTCTGATGTTTATGTAATGGAGATGATCCAGCATATAACACAA	201518843	201518982
chr2	BMPR2	202555407	+	TCTATCCATCATACTGACAGCATC	GTGTTTGTGGTTGTTGTGTTG	CAACACAACAACCACAAACAC	GGTCCTTATCCAGATTATTCTTCCTCCTCATACATTGAAGACTCTATCCATCATACTGACAGCATCGTGAAGAATATTTCCTCTGAGCATTCTATGTCCAGCACACCTTTGACTATAGGGG[A]AAAAAACCGAAATTCAATTAACTATGAACGACAGCAAGCACAAGCTCGAATCCCCAGCCCTGAAACAAGTGTCACCAGCCTCTCCACCAACACAACAACCACAAACACCACAGGACTCA	GTGAAGAATATTTCCTCTGAGCATTCTATGTCCAGCACACCTTTGACTATAGGGG[A]AAAAAACCGAAATTCAATTAACTATGAACGACAGCAAGCACAAGCTCGAATCCCCAGCCCTGAAACAAGTGTCACCAGCCTCTCCAC	202555328	202555515	TCTATCCATCATACTGACAGCATCGTGAAGAATATTTCCTCTGAGCATTCTATGTCCAGCACACCTTTGACTATAGGGGAAAAAAACCGAAATTCAATTAACTATGAACGACAGCAAGCACAAGCTCGAATCCCCAGCCCTGAAACAAGTGTCACCAGCCTCTCCACCAACACAACAACCACAAACAC	202555352	202555494
chr2	ERBB4	211420500	+	TTACCCTATTCGAGTCAATTCTTG	TTTTAGGGTGATGATCGTATGAAG	CTTCATACGATCATCACCCTAAAA	GAACTATTACATGATTTTATATCTCAGAAAGAATATGATATGTGTATATAATTATTTCTTACCCTATTCGAGTCAATTCTTGCTCTGGAAGTATAGATGGGAGGTGGGATGTTGAAAGCCT[G]AGGGACCAAGTACTCCTCAGCATCCATCATATCTTCCAAATCCTCTTCATCCAAGAGATTCTGAAAGAACTTGCTGTCATTTGGACTGGGAAGCTTCATACGATCATCACCCTAAAAGA	CTCTGGAAGTATAGATGGGAGGTGGGATGTTGAAAGCCT[G]AGGGACCAAGTACTCCTCAGCATCCATCATATCTTCCAAATCCTCTTCATCCAAGAGATTCTGAAAGAACTTGCTGTCATTTGGACTGGGAAG	211420437	211420617	TTACCCTATTCGAGTCAATTCTTGCTCTGGAAGTATAGATGGGAGGTGGGATGTTGAAAGCCTGAGGGACCAAGTACTCCTCAGCATCCATCATATCTTCCAAATCCTCTTCATCCAAGAGATTCTGAAAGAACTTGCTGTCATTTGGACTGGGAAGCTTCATACGATCATCACCCTAAAA	211420461	211420593
chr2	RIF1	151464027	+	ACAAAAACTGATTGCTGAACAAAC	TCAGAGGACTTATCTACAATGTCC	GGACATTGTAGATAAGTCCTCTGA	GTTACCTAAACAAAAACTGATTGCTGAACAAACTCTACAGGAGAATTTAATTGAGAAAGGAAGTAATTTACATGAGAAGACTCTTGGGGAAACTAGTGCTAATGCAGAAACTGAACAAAAT[A]AAAAAAAGGCAGACCCTGAGAACATTAAGTCTGAGGGGGATGGTACCCAGGACATTGTAGATAAGTCCTCTGAGAAACTAGTCAGAGGCCGAACACGGTATCAAACTAGAAGAGCATCT	TCTACAGGAGAATTTAATTGAGAAAGGAAGTAATTTACATGAGAAGACTCTTGGGGAAACTAGTGCTAATGCAGAAACTGAACAAAAT[A]AAAAAAAGGCAGACCCTGAGAACATTAAGTCTGAGGGGGATGGTACCCA	151463915	151464100	ACAAAAACTGATTGCTGAACAAACTCTACAGGAGAATTTAATTGAGAAAGGAAGTAATTTACATGAGAAGACTCTTGGGGAAACTAGTGCTAATGCAGAAACTGAACAAAATAAAAAAAAGGCAGACCCTGAGAACATTAAGTCTGAGGGGGATGGTACCCAGGACATTGTAGATAAGTCCTCTGA	151463939	151464076
chr20	ZMYND8	47224440	+	GTAGTCACAGTAGCTGGTGTTC	CTGACCATGGCGGAGATG	CATCTCCGCCATGGTCAG	GACTGGGTGCAGGACTTCATGTGCTCAGGCCAGTGGGCTTGCTGGCAGGGGTAGTCACAGTAGCTGGTGTTCCAACAGCAGTAAAAGATGGCCTCCTTCTTGCAGTTGGCGCACCACTGCT[T]CTTCTTGGTCTCATCCACCGCCTGCTGCTTCTCCAACTCCAGCTGCTTCTTCACCTCGGCGATGAGCCGGTCCCGCTCCTGCTCCAGGCTCTGCCGCATCTCCGCCATGGTCAGCTCTG	CAACAGCAGTAAAAGATGGCCTCCTTCTTGCAGTTGGCGCACCACTGCT[T]CTTCTTGGTCTCATCCACCGCCTGCTGCTTCTCCAACTCCAGCTGCTTCTTCACCTCGGCGATGAGCCGGTCCCGCTCCTGCTCCAGGCTCTGCCG	47224369	47224554	GTAGTCACAGTAGCTGGTGTTCCAACAGCAGTAAAAGATGGCCTCCTTCTTGCAGTTGGCGCACCACTGCTTCTTCTTGGTCTCATCCACCGCCTGCTGCTTCTCCAACTCCAGCTGCTTCTTCACCTCGGCGATGAGCCGGTCCCGCTCCTGCTCCAGGCTCTGCCGCATCTCCGCCATGGTCAG	47224391	47224536
chr20	ZMYND8	47239004	+	AAACTTACTTGATGAGTTCCACAC	CATTCTCCCCCGGAAACAC	GTGTTTCCGGGGGAGAATG	GTTTGAAACTTACTTGATGAGTTCCACACGACCCGCTGCACGGCCGGGGCAGTCTCCTTCGGTAAAAGCGGCCTCTGCTTTTTCACTGGGCTTCCTGTGGCGGCGGGGGCCGGGGCCGTGA[C]GGTGACCGTGGAGGACGTGCTGGTGGTGGCTGTGGCGCCAGCCGCGGAAGTTTGGGCGGAAGAGCGGGTGAGCACCGGTGTTTCCGGGGGAGAATGGCTGCCCACCGTCGTGGATGGTG	GACCCGCTGCACGGCCGGGGCAGTCTCCTTCGGTAAAAGCGGCCTCTGCTTTTTCACTGGGCTTCCTGTGGCGGCGGGGGCCGGGGCCGTGA[C]GGTGACCGTGGAGGACGTGCTGGTGGTGGCTGTGGCGCCAGCCGCGGAAGTTTGGGCGGAAGAGCGGGTGAGCACCG	47238888	47239100	AAACTTACTTGATGAGTTCCACACGACCCGCTGCACGGCCGGGGCAGTCTCCTTCGGTAAAAGCGGCCTCTGCTTTTTCACTGGGCTTCCTGTGGCGGCGGGGGCCGGGGCCGTGACGGTGACCGTGGAGGACGTGCTGGTGGTGGCTGTGGCGCCAGCCGCGGAAGTTTGGGCGGAAGAGCGGGTGAGCACCGGTGTTTCCGGGGGAGAATG	47238912	47239081
chr20	ZMYND8	47246328	+	AAAGTCCTTCTCAGGCTCAG	GATGATGAGCAGAAGTCTAAGAAC	GTTCTTAGACTTCTGCTCATCATC	AAAGTCCTTCTCAGGCTCAGGGCTGGCCTTGTCCTTGACTGCTCCAGGGTCTGCCTTCTCGCTGGCTGGTGACGTGCTTTTCAGCTCCTCTTTAATCTCCACTGGGTTTGTAGGCTTGGGC[T]TTTTTTTAACAGCAGATGGCTCTTTGTCCATCTGACAACCTTCTTTGTCCTCTGTGTCTTCTGGCTCGTTCTTAGACTTCTGCTCATCATCACTGATATACTCACTATCGCTACTATCT	GGCTGGCCTTGTCCTTGACTGCTCCAGGGTCTGCCTTCTCGCTGGCTGGTGACGTGCTTTTCAGCTCCTCTTTAATCTCCACTGGGTTTGTAGGCTTGGGC[T]TTTTTTTAACAGCAGATGGCTCTTTGTCCATCTGACAACCTTCTTTGTCCTCTGTGTCTTCTGGCTC	47246207	47246419	AAAGTCCTTCTCAGGCTCAGGGCTGGCCTTGTCCTTGACTGCTCCAGGGTCTGCCTTCTCGCTGGCTGGTGACGTGCTTTTCAGCTCCTCTTTAATCTCCACTGGGTTTGTAGGCTTGGGCTTTTTTTTAACAGCAGATGGCTCTTTGTCCATCTGACAACCTTCTTTGTCCTCTGTGTCTTCTGGCTCGTTCTTAGACTTCTGCTCATCATC	47246227	47246395
chr3	CTNNB1	41224600	+	TTATAGCTGATTTGATGGAGTTGG	CATACAGGACTTGGGAGGTATC	GATACCTCCCAAGTCCTGTATG	AGTAACATTTCCAATCTACTAATGCTAATACTGTTTCGTATTTATAGCTGATTTGATGGAGTTGGACATGGCCATGGAACCAGACAGAAAAGCGGCTGTTAGTCACTGGCAGCAACAGTCT[T]ACCTGGACTCTGGAATCCATTCTGGTGCCACTACCACAGCTCCTTCTCTGAGTGGTAAAGGCAATCCTGAGGAAGAGGATGTGGATACCTCCCAAGTCCTGTATGAGTGGGAACAGGGA	ACATGGCCATGGAACCAGACAGAAAAGCGGCTGTTAGTCACTGGCAGCAACAGTCT[T]ACCTGGACTCTGGAATCCATTCTGGTGCCACTACCACAGCTCCTTCTCTGAGTGGTAAAGGCAATCCTGAGGAAGAGGATGTG	41224520	41224705	TTATAGCTGATTTGATGGAGTTGGACATGGCCATGGAACCAGACAGAAAAGCGGCTGTTAGTCACTGGCAGCAACAGTCTTACCTGGACTCTGGAATCCATTCTGGTGCCACTACCACAGCTCCTTCTCTGAGTGGTAAAGGCAATCCTGAGGAAGAGGATGTGGATACCTCCCAAGTCCTGTATG	41224544	41224683
chr3	PIK3CA	179198937	+	CCCCCAAGAATCCTAGTAGAATG	TTCTTGAGTAACACTTACGAAAATG	CATTTTCGTAAGTGTTACTCAAGAA	AATCAGAACAATGCCTCCACGACCATCATCAGGTGAACTGTGGGGCATCCACTTGATGCCCCCAAGAATCCTAGTAGAATGTTTACTACCAAATGGAATGATAGTGACTTTAGAATGCCTC[C]GTGAGGCTACATTAATAACCATAAAGCATGAACTATTTAAAGAAGCAAGAAAATACCCCCTCCATCAACTTCTTCAAGATGAATCTTCTTACATTTTCGTAAGTGTTACTCAAGAAGCA	TTTACTACCAAATGGAATGATAGTGACTTTAGAATGCCTC[C]GTGAGGCTACATTAATAACCATAAAGCATGAACTATTTAAAGAAGCAAGAAAATACCCCCTCCATCAACTTCTTCAAGATGAATCTTCTTA	179198874	179199053	CCCCCAAGAATCCTAGTAGAATGTTTACTACCAAATGGAATGATAGTGACTTTAGAATGCCTCCGTGAGGCTACATTAATAACCATAAAGCATGAACTATTTAAAGAAGCAAGAAAATACCCCCTCCATCAACTTCTTCAAGATGAATCTTCTTACATTTTCGTAAGTGTTACTCAAGAA	179198897	179199028
chr3	PIK3CA	179199110	+	TCCATCAACTTCTTCAAGATGAATC	ATCATACCAATTTCTCGATTGAGG	CCTCAATCGAGAAATTGGTATGAT	AATACCCCCTCCATCAACTTCTTCAAGATGAATCTTCTTACATTTTCGTAAGTGTTACTCAAGAAGCAGAAAGGGAAGAATTTTTTGATGAAACAAGACGACTTTGTGACCTTCGGCTTTT[T]CAACCCTTTTTAAAAGTAATTGAACCAGTAGGCAACCGTGAAGAAAAGATCCTCAATCGAGAAATTGGTATGATACAATATCCTATTCTAAAATGCAAATAACCATAAAGCTTAACTGT	TTCTTACATTTTCGTAAGTGTTACTCAAGAAGCAGAAAGGGAAGAATTTTTTGATGAAACAAGACGACTTTGTGACCTTCGGCTTTT[T]CAACCCTTTTTAAAAGTAATTGAACCAGTAGGCAACCGTGAAGAAAAGAT	179198998	179199184	TCCATCAACTTCTTCAAGATGAATCTTCTTACATTTTCGTAAGTGTTACTCAAGAAGCAGAAAGGGAAGAATTTTTTGATGAAACAAGACGACTTTGTGACCTTCGGCTTTTTCAACCCTTTTTAAAAGTAATTGAACCAGTAGGCAACCGTGAAGAAAAGATCCTCAATCGAGAAATTGGTATGAT	179199023	179199160
chr3	PIK3CA	179203765	+	CCACAGCTACACCATATATGAATG	ACATACTACAGGTCAACAGATTAC	GTAATCTGTTGACCTGTAGTATGT	CATCTTATTCCAGACGCATTTCCACAGCTACACCATATATGAATGGAGAAACATCTACAAAATCCCTTTGGGTTATAAATAGTGCACTCAGAATAAAAATTCTTTGTGCAACCTACGTGAA[T]GTAAATATTCGAGACATTGATAAGGTAAAGTCAAATGCTGATGCTTATTATTTTATAGAAATTATTTTAGATAACCTTTTTCTTGCACTATACAGTAATCTGTTGACCTGTAGTATGTT	GAGAAACATCTACAAAATCCCTTTGGGTTATAAATAGTGCACTCAGAATAAAAATTCTTTGTGCAACCTACGTGAA[T]GTAAATATTCGAGACATTGATAAGGTAAAGTCAAATGCTGATGCTTATTATTTTATAGAAATTATTTTAGATAACCTTTTTCTTGCACTATACA	179203665	179203883	CCACAGCTACACCATATATGAATGGAGAAACATCTACAAAATCCCTTTGGGTTATAAATAGTGCACTCAGAATAAAAATTCTTTGTGCAACCTACGTGAATGTAAATATTCGAGACATTGATAAGGTAAAGTCAAATGCTGATGCTTATTATTTTATAGAAATTATTTTAGATAACCTTTTTCTTGCACTATACAGTAATCTGTTGACCTGTAGTATGT	179203689	179203859
chr3	PIK3CA	179234262	+	GAATGCCAGAACTACAATCTTTTG	AGTTCAATGCATGCTGTTTAATTG	CAATTAAACAGCATGCATTGAACT	CCAATCTCTTCATAAATCTTTTCTCAATGATGCTTGGCTCTGGAATGCCAGAACTACAATCTTTTGATGACATTGCATACATTCGAAAGACCCTAGCCTTAGATAAAACTGAGCAAGAGGC[T]TTGGAGTATTTCATGAAACAAATGAATGATGCACATCATGGTGGCTGGACAACAAAAATGGATTGGATCTTCCACACAATTAAACAGCATGCATTGAACTGAAAAGATAACTGAGAAAA	ATGACATTGCATACATTCGAAAGACCCTAGCCTTAGATAAAACTGAGCAAGAGGC[T]TTGGAGTATTTCATGAAACAAATGAATGATGCACATCATGGTGGCTGGACAACAAAAATGGATTGGATCTTCCACA	179234183	179234362	GAATGCCAGAACTACAATCTTTTGATGACATTGCATACATTCGAAAGACCCTAGCCTTAGATAAAACTGAGCAAGAGGCTTTGGAGTATTTCATGAAACAAATGAATGATGCACATCATGGTGGCTGGACAACAAAAATGGATTGGATCTTCCACACAATTAAACAGCATGCATTGAACT	179234207	179234338
chr3	ZBTB20	114339156	+	CTCGATTTGGTCAAACTTTGCTG	AAAAAGAAGTTCTCTCACAAGACC	GGTCTTGTGAGAGAACTTCTTTTT	GTCGTTGAACTGCTCGATTTGGTCAAACTTTGCTGGGCAGACGGAGCAGACGTAAGTGGTCCCCTCCGTGCAGGCCACCACGCCTGGGGGGCCAGCGCGGGCACCTGGGGGTGTGCCTGCA[G]GGGGGGTCCCATTGCTGGCACTGTGCAGGGCCACGTGTCGCTCCAGGAGGGTCTTGTGAGAGAACTTCTTTTTGCAGATGTAGCACTCGTAGGACTTCTCTCCCCGGTGGAGGCGCATG	GGCAGACGGAGCAGACGTAAGTGGTCCCCTCCGTGCAGGCCACCACGCCTGGGGGGCCAGCGCGGGCACCTGGGGGTGTGCCTGCA[G]GGGGGGTCCCATTGCTGGCACTGTGCAGGGCCACGTGTCGCTCCAGGAG	114339047	114339229	CTCGATTTGGTCAAACTTTGCTGGGCAGACGGAGCAGACGTAAGTGGTCCCCTCCGTGCAGGCCACCACGCCTGGGGGGCCAGCGCGGGCACCTGGGGGTGTGCCTGCAGGGGGGGTCCCATTGCTGGCACTGTGCAGGGCCACGTGTCGCTCCAGGAGGGTCTTGTGAGAGAACTTCTTTTT	114339070	114339205
chr3	ZBTB20	114350960	+	AAACTGCTGCTCCACCG	GGAGGACGATTACGACTACTAC	GTAGTAGTCGTAATCGTCCTCC	TGCAGCCTGCTCGGGTTGGGTGGGTTCAGCCTGGCTGTCCCGCGCCGCCCCAGGCCCAAACTGCTGCTCCACCGAGTCAGGCTCGGTGCCTATGGAGGAGCTGACGCCCGAGTCGAAGCTT[T]CACCTTTGGGCTCACTCTCGGTGCCCTCGGCCTGGTCTGTGTCTTCCGTGCACTCCTCGGATTCGTTGCGTTCCAGGATCTGCACCCTTTGCTGCCCGTAGTAGTCGTAATCGTCCTCC	AGTCAGGCTCGGTGCCTATGGAGGAGCTGACGCCCGAGTCGAAGCTT[T]CACCTTTGGGCTCACTCTCGGTGCCCTCGGCCTGGTCTGTGTCTTCCGTGCACTCCTCGGATTCGTTGCGTTCCAGGATCTGCACCCTTTGCTGCCC	114350896	114351079	AAACTGCTGCTCCACCGAGTCAGGCTCGGTGCCTATGGAGGAGCTGACGCCCGAGTCGAAGCTTTCACCTTTGGGCTCACTCTCGGTGCCCTCGGCCTGGTCTGTGTCTTCCGTGCACTCCTCGGATTCGTTGCGTTCCAGGATCTGCACCCTTTGCTGCCCGTAGTAGTCGTAATCGTCCTCC	114350913	114351057
chr4	CENPC	67519272	+	ACAAAAAGTAAAATTTTTAAAGTGCG	TGTTCTTTTGGATGCAAAAACATC	GATGTTTTTGCATCCAAAAGAACA	TACCATTTTTTAATACAAAAAGTAAAATTTTTAAAGTGCGTTAACATTATTTAAATAAAATGTTACCTTTTTTTGGTTTTAACTGAAACCTCTGTACTTGAAGGCAGCATATTTACTGAAT[T]TTCAAAAGTGTAAGTCTCTCTCTTTTGGGCACTAGATGGAATAACATTTTGTGATACAGATGTTTTTGCATCCAAAAGAACAGAAGGTGAGCCAACGGATAAGTAAAATTCTTCATCAG	TTAACATTATTTAAATAAAATGTTACCTTTTTTTGGTTTTAACTGAAACCTCTGTACTTGAAGGCAGCATATTTACTGAAT[T]TTCAAAAGTGTAAGTCTCTCTCTTTTGGGCACTAGATGGAATAACATTTTGTGATACA	67519165	67519354	ACAAAAAGTAAAATTTTTAAAGTGCGTTAACATTATTTAAATAAAATGTTACCTTTTTTTGGTTTTAACTGAAACCTCTGTACTTGAAGGCAGCATATTTACTGAATTTTCAAAAGTGTAAGTCTCTCTCTTTTGGGCACTAGATGGAATAACATTTTGTGATACAGATGTTTTTGCATCCAAAAGAACA	67519191	67519330
chr4	FBXW7	152323000	+	CTTCACTTCATGTCCACATCAAAG	TAAAACTATGGGACTTGAAAACGG	CCGTTTTCAAGTCCCATAGTTTTA	CTTCACTTCATGTCCACATCAAAGTCCAGCACCAGCAGCTTGGTTTCTTCAGTCCCATTCCGACTCCCAACTGCACACACCAGCTTTGTGTTTGAGGCTCTGATCCGCCACACAACTCCCC[C]ACTCCCCCCACTCTCCAATGTGACTAGGTTTCGAATAAATTCACCCGTTTTCAAGTCCCATAGTTTTACAGTTCCATCATCTGAGCTGGTAATTACAAAGTTCTTGTTGAACTGTAAAC	TCCAGCACCAGCAGCTTGGTTTCTTCAGTCCCATTCCGACTCCCAACTGCACACACCAGCTTTGTGTTTGAGGCTCTGATCCGCCACACAACTCCCC[C]ACTCCCCCCACTCTCCAATGTGACTAGGTTTCGAATAAATTCAC	152322879	152323068	CTTCACTTCATGTCCACATCAAAGTCCAGCACCAGCAGCTTGGTTTCTTCAGTCCCATTCCGACTCCCAACTGCACACACCAGCTTTGTGTTTGAGGCTCTGATCCGCCACACAACTCCCCCACTCCCCCCACTCTCCAATGTGACTAGGTTTCGAATAAATTCACCCGTTTTCAAGTCCCATAGTTTTA	152322903	152323044
chr4	FBXW7	152326120	+	ATAGACTCTATTAGTATGCCCCTG	ACTCTTAGGGTTTGGGATATTGAG	CTCAATATCCCAAACCCTAAGAGT	ATCTTACCTGTAATGAATAGACTCTATTAGTATGCCCCTGCAACGTGTGTAGACAGGTTTCAGTCTCTGGATCCCACACCTTTACCATAAAATCATATGCTCCACTAACAACCCTCCTGCC[A]TCATATTGAACACAGCGGACTGCTGCAACATGACCCATCAAAACATGTAAACACTGGCCTGTCTCAATATCCCAAACCCTAAGAGTGGCATCTCGAGAACCGCTAACAACTCTGCAGAG	CAACGTGTGTAGACAGGTTTCAGTCTCTGGATCCCACACCTTTACCATAAAATCATATGCTCCACTAACAACCCTCCTGCC[A]TCATATTGAACACAGCGGACTGCTGCAACATGACCCATCAAAACATGTAAACACTGGCCTGT	152326015	152326206	ATAGACTCTATTAGTATGCCCCTGCAACGTGTGTAGACAGGTTTCAGTCTCTGGATCCCACACCTTTACCATAAAATCATATGCTCCACTAACAACCCTCCTGCCATCATATTGAACACAGCGGACTGCTGCAACATGACCCATCAAAACATGTAAACACTGGCCTGTCTCAATATCCCAAACCCTAAGAGT	152326039	152326182
chr4	FBXW7	152328290	+	AACCATGACAAGATTTTCCCTTAC	TTAAGTGTTTTTCCAGTGTCTGAG	CTCAGACACTGGAAAAACACTTAA	AGAGGAAGAAGTCCCAACCATGACAAGATTTTCCCTTACCTTTTTTCATGAAGATGCATACAACGCACAGTGGAAGTATGCCCATATAAGGTGTGTATACATTCTCCAGTCTCTGCATTCC[A]CACTTTGAGTGTCCGATCTGTAGATCCACTAATGATGATGTTGTCTCTCATTTGTGATGACCATACTCCACCTGTATGTCCCACTAATGTTCTCAGACACTGGAAAAACACTTAAGATG	CTTTTTTCATGAAGATGCATACAACGCACAGTGGAAGTATGCCCATATAAGGTGTGTATACATTCTCCAGTCTCTGCATTCC[A]CACTTTGAGTGTCCGATCTGTAGATCCACTAATGATGATGTTGTCTCTCATTTGTGATGACCATACTCCACCTGTATGTCCCACTAATGTT	152328184	152328405	AACCATGACAAGATTTTCCCTTACCTTTTTTCATGAAGATGCATACAACGCACAGTGGAAGTATGCCCATATAAGGTGTGTATACATTCTCCAGTCTCTGCATTCCACACTTTGAGTGTCCGATCTGTAGATCCACTAATGATGATGTTGTCTCTCATTTGTGATGACCATACTCCACCTGTATGTCCCACTAATGTTCTCAGACACTGGAAAAACACTTAA	152328208	152328381
chr4	TET2	105235670	+	AAGAGCAAGAGATTCTGAAGGG	GAGGTCATTTGATTGGAGAGATTG	CAATCTCTCCAATCAAATGACCTC	AAGAGCAAGAGATTCTGAAGGGTCGAGACAAGGAGCAAACACGAGATCTTGTGCCCCCAACACAGCACTATCTGAAACCAGGATGGATTGAATTGAAGGCCCCTCGTTTTCACCAAGCGGA[A]TCCCATCTAAAACGTAATGAGGCATCACTGCCATCAATTCTTCAGTATCAACCCAATCTCTCCAATCAAATGACCTCCAAACAATACACTGGAAATTCCAACATGCCTGGGGGGCTCCC	TCGAGACAAGGAGCAAACACGAGATCTTGTGCCCCCAACACAGCACTATCTGAAACCAGGATGGATTGAATTGAAGGCCCCTCGTTTTCACCAAGCGGA[A]TCCCATCTAAAACGTAATGAGGCATCACTGCCATCAATTCTTCAGTATCAACC	105235549	105235747	AAGAGCAAGAGATTCTGAAGGGTCGAGACAAGGAGCAAACACGAGATCTTGTGCCCCCAACACAGCACTATCTGAAACCAGGATGGATTGAATTGAAGGCCCCTCGTTTTCACCAAGCGGAATCCCATCTAAAACGTAATGAGGCATCACTGCCATCAATTCTTCAGTATCAACCCAATCTCTCCAATCAAATGACCTC	105235571	105235723
chr5	APC	112838850	+	GGCAAGACCCAAACACATAATAG	ATTAGAACCCACTCGATTTGTTTC	GAAACAAATCGAGTGGGTTCTAAT	GAATGAAAGATGGGCAAGACCCAAACACATAATAGAAGATGAAATAAAACAAAGTGAGCAAAGACAATCAAGGAATCAAAGTACAACTTATCCTGTTTATACTGAGAGCACTGATGATAAA[C]ACCTCAAGTTCCAACCACATTTTGGACAGCAGGAATGTGTTTCTCCATACAGGTCACGGGGAGCCAATGGTTCAGAAACAAATCGAGTGGGTTCTAATCATGGAATTAATCAAAATGTA	AAGATGAAATAAAACAAAGTGAGCAAAGACAATCAAGGAATCAAAGTACAACTTATCCTGTTTATACTGAGAGCACTGATGATAAA[C]ACCTCAAGTTCCAACCACATTTTGGACAGCAGGAATGTGTTTCTCCATACAGGTCACGGGGAGCCAATGGTTCA	112838741	112838948	GGCAAGACCCAAACACATAATAGAAGATGAAATAAAACAAAGTGAGCAAAGACAATCAAGGAATCAAAGTACAACTTATCCTGTTTATACTGAGAGCACTGATGATAAACACCTCAAGTTCCAACCACATTTTGGACAGCAGGAATGTGTTTCTCCATACAGGTCACGGGGAGCCAATGGTTCAGAAACAAATCGAGTGGGTTCTAAT	112838764	112838924
chr5	APC	112839510	+	TATCATCTTTGTCATCAGCTGAAG	TCTGAAGATAAACTAGAACCCTGC	GCAGGGTTCTAGTTTATCTTCAGA	AGATACTCCAATATGTTTTTCAAGATGTAGTTCATTATCATCTTTGTCATCAGCTGAAGATGAAATAGGATGTAATCAGACGACACAGGAAGCAGATTCTGCTAATACCCTGCAAATAGCA[G]AAATAAAAGAAAAGATTGGAACTAGGTCAGCTGAAGATCCTGTGAGCGAAGTTCCAGCAGTGTCACAGCACCCTAGAACCAAATCCAGCAGACTGCAGGGTTCTAGTTTATCTTCAGAA	ATGAAATAGGATGTAATCAGACGACACAGGAAGCAGATTCTGCTAATACCCTGCAAATAGCA[G]AAATAAAAGAAAAGATTGGAACTAGGTCAGCTGAAGATCCTGTGAGCGAAGTTCCAGCAGTGTCACAGCACCCTAGAACCAAATCCAGCAGACT	112839424	112839628	TATCATCTTTGTCATCAGCTGAAGATGAAATAGGATGTAATCAGACGACACAGGAAGCAGATTCTGCTAATACCCTGCAAATAGCAGAAATAAAAGAAAAGATTGGAACTAGGTCAGCTGAAGATCCTGTGAGCGAAGTTCCAGCAGTGTCACAGCACCCTAGAACCAAATCCAGCAGACTGCAGGGTTCTAGTTTATCTTCAGA	112839448	112839604
chr5	APC	112839760	+	CAAAGCTGTTGAATTTTCTTCAGG	TTATAATGCCACTTACCATTCCAC	GTGGAATGGTAAGTGGCATTATAA	CACAAAGCTGTTGAATTTTCTTCAGGAGCGAAATCTCCCTCCAAAAGTGGTGCTCAGACACCCAAAAGTCCACCTGAACACTATGTTCAGGAGACCCCACTCATGTTTAGCAGATGTACTT[C]TGTCAGTTCACTTGATAGTTTTGAGAGTCGTTCGATTGCCAGCTCCGTTCAGAGTGAACCATGCAGTGGAATGGTAAGTGGCATTATAAGCCCCAGTGATCTTCCAGATAGCCCTGGAC	AGCGAAATCTCCCTCCAAAAGTGGTGCTCAGACACCCAAAAGTCCACCTGAACACTATGTTCAGGAGACCCCACTCATGTTTAGCAGATGTACTT[C]TGTCAGTTCACTTGATAGTTTTGAGAGTCGTTCGATTGCCAGCTCCGTTCAGAGTGAACCATGCA	112839641	112839849	CAAAGCTGTTGAATTTTCTTCAGGAGCGAAATCTCCCTCCAAAAGTGGTGCTCAGACACCCAAAAGTCCACCTGAACACTATGTTCAGGAGACCCCACTCATGTTTAGCAGATGTACTTCTGTCAGTTCACTTGATAGTTTTGAGAGTCGTTCGATTGCCAGCTCCGTTCAGAGTGAACCATGCAGTGGAATGGTAAGTGGCATTATAA	112839665	112839825
chr5	APC	112839979	+	CAAGCAGAAGTAAAACACCTCC	TTTCCGTGGCAAAATGTAATAAAG	CTTTATTACATTTTGCCACGGAAA	GATCTTCCAGATAGCCCTGGACAAACCATGCCACCAAGCAGAAGTAAAACACCTCCACCACCTCCTCAAACAGCTCAAACCAAGCGAGAAGTACCTAAAAATAAAGCACCTACTGCTGAAA[A]GAGAGAGAGTGGACCTAAGCAAGCTGCAGTAAATGCTGCAGTTCAGAGGGTCCAGGTTCTTCCAGATGCTGATACTTTATTACATTTTGCCACGGAAAGTACTCCAGATGGATTTTCTT	ACCACCTCCTCAAACAGCTCAAACCAAGCGAGAAGTACCTAAAAATAAAGCACCTACTGCTGAAA[A]GAGAGAGAGTGGACCTAAGCAAGCTGCAGTAAATGCTGCAGTTCAGAGGGTCCAGGTTCTTCCAGATGCTGATA	112839892	112840077	CAAGCAGAAGTAAAACACCTCCACCACCTCCTCAAACAGCTCAAACCAAGCGAGAAGTACCTAAAAATAAAGCACCTACTGCTGAAAAGAGAGAGAGTGGACCTAAGCAAGCTGCAGTAAATGCTGCAGTTCAGAGGGTCCAGGTTCTTCCAGATGCTGATACTTTATTACATTTTGCCACGGAAA	112839914	112840053
chr5	APC	112840254	+	GGAAAATGACAATGGGAATGAAAC	TTTTTGCTTTACGTGATGACTTTG	CAAAGTCATCACGTAAAGCAAAAA	GCCATTTATACAGAAAGATGTGGAATTAAGAATAATGCCTCCAGTTCAGGAAAATGACAATGGGAATGAAACAGAATCAGAGCAGCCTAAAGAATCAAATGAAAACCAAGAGAAAGAGGCA[G]AAAAAACTATTGATTCTGAAAAGGACCTATTAGATGATTCAGATGATGATGATATTGAAATACTAGAAGAATGTATTATTTCTGCCATGCCAACAAAGTCATCACGTAAAGCAAAAAAG	AGAATCAGAGCAGCCTAAAGAATCAAATGAAAACCAAGAGAAAGAGGCA[G]AAAAAACTATTGATTCTGAAAAGGACCTATTAGATGATTCAGATGATGATGATATTGAAATACTAGAAGAATGTATTATTTCTGCCATGCCAA	112840181	112840371	GGAAAATGACAATGGGAATGAAACAGAATCAGAGCAGCCTAAAGAATCAAATGAAAACCAAGAGAAAGAGGCAGAAAAAACTATTGATTCTGAAAAGGACCTATTAGATGATTCAGATGATGATGATATTGAAATACTAGAAGAATGTATTATTTCTGCCATGCCAACAAAGTCATCACGTAAAGCAAAAA	112840205	112840347
chr5	NSD1	177248268	+	TTTCTTTGCAAGGGAGAACTAATG	GTTTCCCTTTAAAGATGAACATGC	GCATGTTCATCTTTAAAGGGAAAC	ATACAGATGTGGGACATTATTTTTTCTTTGCAAGGGAGAACTAATGCCTCACAGGACGGCCACAAGCCCCAAGGAGACTGTTGAGGAAGGTGTAGAACACGATCCCGGGATGCCTGCCTCT[A]AAAAAATGCAGGGTGAACGCGGTGGAGGAGCTGCACTCAAGGAGAATGTCTGTCAGGTAGAGAAATGTTTGCCCACTTGTGTTTTCATTGCATGTTCATCTTTAAAGGGAAACCCACTC	CCTCACAGGACGGCCACAAGCCCCAAGGAGACTGTTGAGGAAGGTGTAGAACACGATCCCGGGATGCCTGCCTCT[A]AAAAAATGCAGGGTGAACGCGGTGGAGGAGCTGCACTCAAGGAGAATGTCTGTCAGGTAGAGAAATGTTTGCCCACTTGTGTTTTCATT	177248169	177248381	TTTCTTTGCAAGGGAGAACTAATGCCTCACAGGACGGCCACAAGCCCCAAGGAGACTGTTGAGGAAGGTGTAGAACACGATCCCGGGATGCCTGCCTCTAAAAAAATGCAGGGTGAACGCGGTGGAGGAGCTGCACTCAAGGAGAATGTCTGTCAGGTAGAGAAATGTTTGCCCACTTGTGTTTTCATTGCATGTTCATCTTTAAAGGGAAAC	177248193	177248357
chr5	PIK3R1	68293230	+	ATGAAAAACTTCGAGATACAGCAG	AATTTGTTATTTCCCCCTTTCCTG	CAGGAAAGGGGGAAATAACAAATT	TGAATGAAAAACTTCGAGATACAGCAGACGGGACCTTTTTGGTACGAGATGCGTCTACTAAAATGCATGGTGATTATACTCTTACACTAAGGTAAGCCAGGGAATATAGCTGAAATTAGGG[T]TTTGGGCTGATATTAAAACATATTTCCTTATTCCAAAATGTTAATACCTTTATTTTTATATTGTTTTTACAGGAAAGGGGGAAATAACAAATTAATCAAAATATTTCATCGAGATGGGA	ACGGGACCTTTTTGGTACGAGATGCGTCTACTAAAATGCATGGTGATTATACTCTTACACTAAGGTAAGCCAGGGAATATAGCTGAAATTAGGG[T]TTTGGGCTGATATTAAAACATATTTCCTTATTCCAAAATGTTAATACCTTTATTTTTATATTGTTTTTA	68293112	68293323	ATGAAAAACTTCGAGATACAGCAGACGGGACCTTTTTGGTACGAGATGCGTCTACTAAAATGCATGGTGATTATACTCTTACACTAAGGTAAGCCAGGGAATATAGCTGAAATTAGGGTTTTGGGCTGATATTAAAACATATTTCCTTATTCCAAAATGTTAATACCTTTATTTTTATATTGTTTTTACAGGAAAGGGGGAAATAACAAATT	68293136	68293299
chr5	PIK3R1	68295288	+	AGATTGGAAGAAGACTTGAAGAAG	AACTCATCCTGAATTGTAGCAATC	GATTGCTACAATTCAGGATGAGTT	AAGTTGAAGTCTCGAATCAGTGAAATTATTGACAGTAGAAGAAGATTGGAAGAAGACTTGAAGAAGCAGGCAGCTGAGTATCGAGAAATTGACAAACGTATGAACAGCATTAAACCAGACC[T]TATCCAGCTGAGAAAGACGAGAGACCAATACTTGATGTAAGTATTTGAAATGGAATCCTATACATGAATAATTGGTGATTGCTACAATTCAGGATGAGTTAATGCGTTCTCTTTTCAAA	CAGGCAGCTGAGTATCGAGAAATTGACAAACGTATGAACAGCATTAAACCAGACC[T]TATCCAGCTGAGAAAGACGAGAGACCAATACTTGATGTAAGTATTTGAAATGGAATCCTATACATGAATAATTGGT	68295209	68295388	AGATTGGAAGAAGACTTGAAGAAGCAGGCAGCTGAGTATCGAGAAATTGACAAACGTATGAACAGCATTAAACCAGACCTTATCCAGCTGAGAAAGACGAGAGACCAATACTTGATGTAAGTATTTGAAATGGAATCCTATACATGAATAATTGGTGATTGCTACAATTCAGGATGAGTT	68295233	68295364
chr7	AKAP9	91973771	+	TGGTGGCAATAAAGAAAAATTATC	CAATATTCAAATCATGGTGTGCTG	CAGCACACCATGATTTGAATATTG	TTCTTGGTGGCAATAAAGAAAAATTATCTTTGACAATAACGGTTATTTTCTTTTTTCTTAGCTTGCCCAGTTTCGACAAAGAAAAGCTCAGTCGGATGGGCAGAGTCCTTCCAAGAAGCAG[A]AAAAAAAGAGAAAAACGTCAAGCAGTAAACATGATGTGTCAGCACACCATGATTTGAATATTGATCAATCACAGTGTAATGAAATGTACATAAATAGTTCTCAGAGAGTAGAATCAACT	TTTGACAATAACGGTTATTTTCTTTTTTCTTAGCTTGCCCAGTTTCGACAAAGAAAAGCTCAGTCGGATGGGCAGAGTCCTTCCAAGAAGCAG[A]AAAAAAAGAGAAAAACGTCAAGCAGTAAACATGATGTGT	91973654	91973834	TGGTGGCAATAAAGAAAAATTATCTTTGACAATAACGGTTATTTTCTTTTTTCTTAGCTTGCCCAGTTTCGACAAAGAAAAGCTCAGTCGGATGGGCAGAGTCCTTCCAAGAAGCAGAAAAAAAAGAGAAAAACGTCAAGCAGTAAACATGATGTGTCAGCACACCATGATTTGAATATTG	91973678	91973810
chr7	AKAP9	92102710	+	AATACTTGAGGGCAGAAAGTTTTC	CTGGAAATTGCAATGGATACTCTG	CAGAGTATCCATTGCAATTTCCAG	TATAGAGAATTTATGGTAAATACTTGAGGGCAGAAAGTTTTCGAAAGGCTCTCATTTACCAGAAGAAATACCTGCTGCTGTTACTGGGTGGGTTCCAGGAATGTGAAGATGCCACCTTGGC[C]CTGCTTGCCCGGATGGGGGGGCAGCCAGCTTTCACGGATCTAGAGGTGATCACCAATCGCCCAAAGGGCTTCACCAGGTTTCGGTCGGCCGTCAGAGTATCCATTGCAATTTCCAGGTA	GAAAGGCTCTCATTTACCAGAAGAAATACCTGCTGCTGTTACTGGGTGGGTTCCAGGAATGTGAAGATGCCACCTTGGC[C]CTGCTTGCCCGGATGGGGGGGCAGCCAGCTTTCACGGATCTAGAGGTGATCACCAATCGCCCAAAGGGCTTCACCAGGTTTCGGTCGGCCGT	92102607	92102826	AATACTTGAGGGCAGAAAGTTTTCGAAAGGCTCTCATTTACCAGAAGAAATACCTGCTGCTGTTACTGGGTGGGTTCCAGGAATGTGAAGATGCCACCTTGGCCCTGCTTGCCCGGATGGGGGGGCAGCCAGCTTTCACGGATCTAGAGGTGATCACCAATCGCCCAAAGGGCTTCACCAGGTTTCGGTCGGCCGTCAGAGTATCCATTGCAATTTCCAG	92102631	92102802
chr7	BRAF	140753355	+	TCAGTGGAAAAATAGCCTCAATTC	CTTCATAATGCTTGCTCTGATAGG	CCTATCAGAGCAAGCATTATGAAG	GCCAAAAATTTAATCAGTGGAAAAATAGCCTCAATTCTTACCATCCACAAAATGGATCCAGACAACTGTTCAAACTGATGGGACCCACTCCATCGAGATTTCACTGTAGCTAGACCAAAAT[C]ACCTATTTTTACTGTGAGGTCTTCATGAAGAAATATATCTGAGGTGTAGTAAGTAAAGGAAAACAGTAGATCTCATTTTCCTATCAGAGCAAGCATTATGAAGAGTTTAGGTAAGAGAT	TTACCATCCACAAAATGGATCCAGACAACTGTTCAAACTGATGGGACCCACTCCATCGAGATTTCACTGTAGCTAGACCAAAAT[C]ACCTATTTTTACTGTGAGGTCTTCATGAAGAAATATATCTGAGGTGTAGTAAGTAAAGGAAAACAGTAGATCTCATTTT	140753247	140753458	TCAGTGGAAAAATAGCCTCAATTCTTACCATCCACAAAATGGATCCAGACAACTGTTCAAACTGATGGGACCCACTCCATCGAGATTTCACTGTAGCTAGACCAAAATCACCTATTTTTACTGTGAGGTCTTCATGAAGAAATATATCTGAGGTGTAGTAAGTAAAGGAAAACAGTAGATCTCATTTTCCTATCAGAGCAAGCATTATGAAG	140753271	140753434
chr7	BRAF	140783127	+	TACTCTTACCATTCGATTCCTGTC	TCTAAATATCCCCCAACCTTCTAC	GTAGAAGGTTGGGGGATATTTAGA	ATCATATACTCTTACCATTCGATTCCTGTCTTCTGAGGATGAAGATGACTTCCTTTCTCGCTGAGGTCCTGGAGATTTCTGTAAGGCTTTCACGTTAGTTAGTGAGCCAGGTAATGAGGCA[G]GGGGGGTAGCAGACAAACCTGTGGTTGATCCTAAATTAGTGAAAAGAAAAATGTATACATTAAGGAGGAGCAAGTATGTTAATTTATCAGGGGTAGAAGGTTGGGGGATATTTAGACTT	TTCTGAGGATGAAGATGACTTCCTTTCTCGCTGAGGTCCTGGAGATTTCTGTAAGGCTTTCACGTTAGTTAGTGAGCCAGGTAATGAGGCA[G]GGGGGGTAGCAGACAAACCTGTGGTTGATCCTAAATTAGTGAAAAGAAAAATGTATACATTAAGGAGGAGCAAGTATGTTAATTTATCAGGG	140783012	140783243	TACTCTTACCATTCGATTCCTGTCTTCTGAGGATGAAGATGACTTCCTTTCTCGCTGAGGTCCTGGAGATTTCTGTAAGGCTTTCACGTTAGTTAGTGAGCCAGGTAATGAGGCAGGGGGGGTAGCAGACAAACCTGTGGTTGATCCTAAATTAGTGAAAAGAAAAATGTATACATTAAGGAGGAGCAAGTATGTTAATTTATCAGGGGTAGAAGGTTGGGGGATATTTAGA	140783036	140783219
chr7	CUX1	101916133	+	AGTGTTCTGGTCAAATGCAAATAG	ACCTCTGGAGTGTTCTTCTTG	CAAGAAGAACACTCCAGAGGT	ACTGGGGTCTCTCCCCCAGTGTTCTGGTCAAATGCAAATAGGACCCTCCTCTAGTACACAGTGCAATTACAATCTCACTTTTCCTTTCCTGTTTCCCCAACAGAGAGAACTCGATGCCACC[G]CAACGGTATTGGCGAACCGGCAGGATGAAAGTGAGCAGTCCAGAAAGCGGCTTATCGAACAGAGCCGGGAGTTCAAGAAGAACACTCCAGAGGTGAGGCGCGTGACCATCGTGTTCGCT	GACCCTCCTCTAGTACACAGTGCAATTACAATCTCACTTTTCCTTTCCTGTTTCCCCAACAGAGAGAACTCGATGCCACC[G]CAACGGTATTGGCGAACCGGCAGGATGAAAGTGAGCAGTCCAGAAAGCGGCTTATCGAACAGAGCCGGGAGTT	101916029	101916227	AGTGTTCTGGTCAAATGCAAATAGGACCCTCCTCTAGTACACAGTGCAATTACAATCTCACTTTTCCTTTCCTGTTTCCCCAACAGAGAGAACTCGATGCCACCGCAACGGTATTGGCGAACCGGCAGGATGAAAGTGAGCAGTCCAGAAAGCGGCTTATCGAACAGAGCCGGGAGTTCAAGAAGAACACTCCAGAGGT	101916053	101916206
chr7	CUX1	102196722	+	ATAATGCATTCTGTTTGCCCTTC	AGCTGAAAAAGTCTTGACTTAACC	GGTTAAGTCAAGACTTTTTCAGCT	CCCATAATGCATTCTGTTTGCCCTTCCTTGTAGGGTCAGCCAGGAGGAAAGGGAAAGACCAGCCTGAAAGTCGGCGCCCGGGATCTTTGCCGGCCCCCCCTCCTTCTCAGTTGCCCCGCAA[C]CCGGGGGAGCAGGCTTCCAATACTAATGGTACACACCAGTTCTCACCAGCGGGGTTAAGTCAAGACTTTTTCAGCTCATCCCTGGCAAGCCCCAGCCTACCCCTGGCTTCTACAGGAAA	CTTGTAGGGTCAGCCAGGAGGAAAGGGAAAGACCAGCCTGAAAGTCGGCGCCCGGGATCTTTGCCGGCCCCCCCTCCTTCTCAGTTGCCCCGCAA[C]CCGGGGGAGCAGGCTTCCAATACTAATGGTACACACCAGTTCTCACCAGCGG	102196604	102196798	ATAATGCATTCTGTTTGCCCTTCCTTGTAGGGTCAGCCAGGAGGAAAGGGAAAGACCAGCCTGAAAGTCGGCGCCCGGGATCTTTGCCGGCCCCCCCTCCTTCTCAGTTGCCCCGCAACCCGGGGGAGCAGGCTTCCAATACTAATGGTACACACCAGTTCTCACCAGCGGGGTTAAGTCAAGACTTTTTCAGCT	102196627	102196774
chr8	MYBL1	66576218	+	TCGCATTTTTCTCTTCTTTCTGAG	ATCCACCCCAGTTAAATTAATGAG	CTCATTAATTTAACTGGGGTGGAT	GCCTGGGGAATGACCCACTCGCATTTTTCTCTTCTTTCTGAGGATGGCTGGTGGAGTGCTAAACTTGGCTATATTTGGGGATGTTAAAGGAACAGCTTCACTGTTGCCACCATTACAAGTG[T]TTTTTTTCCCTTCAAGTACAAGACTGACGTTAAATTGGCATTCCATGGCTCCTTCATTGTGCTGAATTCTCATTAATTTAACTGGGGTGGATTTGATAGGAGAAGCAGCAGCATCAGAA	GATGGCTGGTGGAGTGCTAAACTTGGCTATATTTGGGGATGTTAAAGGAACAGCTTCACTGTTGCCACCATTACAAGTG[T]TTTTTTTCCCTTCAAGTACAAGACTGACGTTAAATTGGCATTCCATGGCTCCTTCATTGTGCTGAATT	66576115	66576310	TCGCATTTTTCTCTTCTTTCTGAGGATGGCTGGTGGAGTGCTAAACTTGGCTATATTTGGGGATGTTAAAGGAACAGCTTCACTGTTGCCACCATTACAAGTGTTTTTTTTCCCTTCAAGTACAAGACTGACGTTAAATTGGCATTCCATGGCTCCTTCATTGTGCTGAATTCTCATTAATTTAACTGGGGTGGAT	66576139	66576286
chr8	RUNX1T1	91986220	+	TGAAGAAAAGTTACCTAGTGCAAC	TAGCTGTTAAACTGCATAATGGAC	GTCCATTATGCAGTTTAACAGCTA	AGATACTCATCTGAAGAAAAGTTACCTAGTGCAACTGGGTCTGGGTTGACGGGACTCTGCTGCCTAGAGTGGCTGCTGCTACTGCCGCCACCTTTTTTTAAGTCCTCGGCGTCACTGTACC[G]CCGGATCCAGTAATTCAATTCTTCCCGGTCTGCTTCTTGACACCGCCTTAGTACGGTGAGAGATCGCCTTGTTTTTTCTACCATGTCCATTATGCAGTTTAACAGCTATTTGGGAAAGG	TGGGTCTGGGTTGACGGGACTCTGCTGCCTAGAGTGGCTGCTGCTACTGCCGCCACCTTTTTTTAAGTCCTCGGCGTCACTGTACC[G]CCGGATCCAGTAATTCAATTCTTCCCGGTCTGCTTCTTGACACCGCCTTAGTACGGTGAGAGATCGCCTTGTTTTTTCTACCAT	91986110	91986328	TGAAGAAAAGTTACCTAGTGCAACTGGGTCTGGGTTGACGGGACTCTGCTGCCTAGAGTGGCTGCTGCTACTGCCGCCACCTTTTTTTAAGTCCTCGGCGTCACTGTACCGCCGGATCCAGTAATTCAATTCTTCCCGGTCTGCTTCTTGACACCGCCTTAGTACGGTGAGAGATCGCCTTGTTTTTTCTACCATGTCCATTATGCAGTTTAACAGCTA	91986134	91986304
chr8	RUNX1T1	92005194	+	GGAAAAAGGTCATGGTTCATCC	CAAGACTGGCCAAACAGAAC	GTTCTGTTTGGCCAGTCTTG	GGGAAAAAGGTCATGGTTCATCCAGGCTCCTCCTCCCTCTCACCTGTCTGGAGTTCGCCTCTTCCCGTTTTCGTTCACATCGAGAAGCAGCTCTGAGGAGTCAACAGGTGAGGTGGTGCTG[G]CATCCAGAAGCAGCTGTTCATGCTGGGCGAGGTACTGGGCAGGGTTCTGTTTGGCCAGTCTTGCGCAGTGGAGGAGCTCACGCTGCAGCAGGGGCAAGTTGGCCTGCAAGGGAATGACA	AGGCTCCTCCTCCCTCTCACCTGTCTGGAGTTCGCCTCTTCCCGTTTTCGTTCACATCGAGAAGCAGCTCTGAGGAGTCAACAGGTGAGGTGGTGCTG[G]CATCCAGAAGCAGCTGTTCATGCTGGGCGAGGTACTGGGCAGG	92005074	92005257	GGAAAAAGGTCATGGTTCATCCAGGCTCCTCCTCCCTCTCACCTGTCTGGAGTTCGCCTCTTCCCGTTTTCGTTCACATCGAGAAGCAGCTCTGAGGAGTCAACAGGTGAGGTGGTGCTGGCATCCAGAAGCAGCTGTTCATGCTGGGCGAGGTACTGGGCAGGGTTCTGTTTGGCCAGTCTTG	92005096	92005237
chr8	UBR5	102277121	+	TTCAGTAAGTCCTATTTCTGCTAG	CAAAAATGTCTTATGCTGCCAATC	GATTGGCAGCATAAGACATTTTTG	TTTCAGTAAGTCCTATTTCTGCTAGTAAGCTACTTTTTAATTGTGCAGCAAGATCATGAGCAGATGGCCCTGGTTTTGAACTCTCAGTTTCTTCTGGCAGCACGGGCTGTTCTTCCCCTTC[T]TTTTTTTGCCGGTTTTGCATGTTCATTACATTTTTCAGATTGGCAGCATAAGACATTTTTGTTGGAAGAACCTATGAATATTTACATTTAAAAGTTACAAATGAAGGGAAAAAAACTAA	TAAGCTACTTTTTAATTGTGCAGCAAGATCATGAGCAGATGGCCCTGGTTTTGAACTCTCAGTTTCTTCTGGCAGCACGGGCTGTTCTTCCCCTTC[T]TTTTTTTGCCGGTTTTGCATGTTCATTACATTTTTCA	102277001	102277182	TTCAGTAAGTCCTATTTCTGCTAGTAAGCTACTTTTTAATTGTGCAGCAAGATCATGAGCAGATGGCCCTGGTTTTGAACTCTCAGTTTCTTCTGGCAGCACGGGCTGTTCTTCCCCTTCTTTTTTTTGCCGGTTTTGCATGTTCATTACATTTTTCAGATTGGCAGCATAAGACATTTTTG	102277025	102277158
chr9	CDKN2A	21971030	+	ATCTATGCGGGCATGGTTAC	ACTCTCACCCGACCCG	CGGGTCGGGTGAGAGT	ACCTTCCGCGGCATCTATGCGGGCATGGTTACTGCCTCTGGTGCCCCCCGCAGCCGCGCGCAGGTACCGTGCGACATCGCGATGGCCCAGCTCCTCAGCCAGGTCCACGGGCAGACGGCCC[C]AGGCATCGCGCACGTCCAGCCGCGCCCCGGCCCGGTGCAGCACCACCAGCGTGTCCAGGAAGCCCTCCCGGGCAGCGTCGTGCACGGGTCGGGTGAGAGTGGCGGGGTCGGCGCAGTTG	TGCCTCTGGTGCCCCCCGCAGCCGCGCGCAGGTACCGTGCGACATCGCGATGGCCCAGCTCCTCAGCCAGGTCCACGGGCAGACGGCCC[C]AGGCATCGCGCACGTCCAGCCGCGCCCCGGCCCGGTGCAGCACCACCAGCGTGTCCAGGAAGCCCTCCCGGGCAGCGTCGTGCA	21970921	21971130	ATCTATGCGGGCATGGTTACTGCCTCTGGTGCCCCCCGCAGCCGCGCGCAGGTACCGTGCGACATCGCGATGGCCCAGCTCCTCAGCCAGGTCCACGGGCAGACGGCCCCAGGCATCGCGCACGTCCAGCCGCGCCCCGGCCCGGTGCAGCACCACCAGCGTGTCCAGGAAGCCCTCCCGGGCAGCGTCGTGCACGGGTCGGGTGAGAGT	21970941	21971114
chr9	NOTCH1	136500712	+	CATGTTGTCCTGGATGTTGG	CAACAGCGAGGAAGAGGAG	CTCCTCTTCCTCGCTGTTG	CAGCGGGGTGCGGCCCATGTTGTCCTGGATGTTGGCATCTGCGCTGGCCTCCAGCAGGCGCTTGGCGGCATCAGAGCGTGAGTAGCGGGCGGCCAGGTGCAAGGCGGTCTCGCCCGTGCGG[T]CTGTCTGGTTGTGCAGGCTGGCGCCCTGGTAGATGAAGTCGGAGATGACGGCCGGCGCGTCCTCCTCTTCCTCGCTGTTGCCCGTCTCCAGGCCGCCCCCGCTGCAGGAGGCGATCATG	CATCTGCGCTGGCCTCCAGCAGGCGCTTGGCGGCATCAGAGCGTGAGTAGCGGGCGGCCAGGTGCAAGGCGGTCTCGCCCGTGCGG[T]CTGTCTGGTTGTGCAGGCTGGCGCCCTGGTAGATGAAGTCGGAGATGACGGCCGGCGCGTC	136500606	136500792	CATGTTGTCCTGGATGTTGGCATCTGCGCTGGCCTCCAGCAGGCGCTTGGCGGCATCAGAGCGTGAGTAGCGGGCGGCCAGGTGCAAGGCGGTCTCGCCCGTGCGGTCTGTCTGGTTGTGCAGGCTGGCGCCCTGGTAGATGAAGTCGGAGATGACGGCCGGCGCGTCCTCCTCTTCCTCGCTGTTG	136500626	136500773
chr9	PTCH1	95447367	+	AGAATGCCCTTCAGTAGAAATTTC	ATACCACCCTTCTAACCCACC	GGTGGGTTAGAAGGGTGGTAT	GCCCTATTGCTAGGGCCAGAATGCCCTTCAGTAGAAATTTCAAAAGCGTCTCTGCGCGGTCTGTAGGGGGGTGGCCACAAGCCTTCTCTGGGGGGGTCCCTGCGGGGCTGCTGGCCTTGCC[G]TCCGGGAGGCAGGGACCCTGAGTCCAGGTGGGGCTGCTGTCTCGGGTTCGAGGGTGGGTGATGCCTGGATTCGGGATGGACCACCTGCAGAGGGTGAGGGTGGGTTAGAAGGGTGGTAT	AAAAGCGTCTCTGCGCGGTCTGTAGGGGGGTGGCCACAAGCCTTCTCTGGGGGGGTCCCTGCGGGGCTGCTGGCCTTGCC[G]TCCGGGAGGCAGGGACCCTGAGTCCAGGTGGGGCTGCTGTCTCGGGTTCGAGGGTGGGTGATGCCTGGATTCGGGATGGACCACCTGCAGAGGGTGAG	95447263	95447486	AGAATGCCCTTCAGTAGAAATTTCAAAAGCGTCTCTGCGCGGTCTGTAGGGGGGTGGCCACAAGCCTTCTCTGGGGGGGTCCCTGCGGGGCTGCTGGCCTTGCCGTCCGGGAGGCAGGGACCCTGAGTCCAGGTGGGGCTGCTGTCTCGGGTTCGAGGGTGGGTGATGCCTGGATTCGGGATGGACCACCTGCAGAGGGTGAGGGTGGGTTAGAAGGGTGGTAT	95447287	95447465
chr9	PTCH1	95449220	+	GCTTCCACGATCACTTGGTG	GAATCCCCTTAAATAGGTGTCTCC	GGAGACACCTATTTAAGGGGATTC	GGCTTCCACGATCACTTGGTGGGCAGGGCCTCCCGCGCCCTGCTGGGCCTCGTAGTGCCGAAGCTCCTCGCTGAGGCCTGACACTGTCGTCTGGGAACTATACTCCGAGTCGGAGGAATCA[G]ACCCGCTGTGCGTGTGGCCGGGCGGCATGGCGAAGCGGACCACGCTGGGGGGTGGCTCAGGGGAGGGTGTGGGCAGGCGGTTCAAGCCGTTGGCTGGAGACACCTATTTAAGGGGATTC	GGCAGGGCCTCCCGCGCCCTGCTGGGCCTCGTAGTGCCGAAGCTCCTCGCTGAGGCCTGACACTGTCGTCTGGGAACTATACTCCGAGTCGGAGGAATCA[G]ACCCGCTGTGCGTGTGGCCGGGCGGCATGGCGAAGCGGACCACGCTGGGGGGTGGCTCAGGGGAGGGTGTGGGCAGGCGGTTCAAGCCGTTGGCT	95449100	95449339	GCTTCCACGATCACTTGGTGGGCAGGGCCTCCCGCGCCCTGCTGGGCCTCGTAGTGCCGAAGCTCCTCGCTGAGGCCTGACACTGTCGTCTGGGAACTATACTCCGAGTCGGAGGAATCAGACCCGCTGTGCGTGTGGCCGGGCGGCATGGCGAAGCGGACCACGCTGGGGGGTGGCTCAGGGGAGGGTGTGGGCAGGCGGTTCAAGCCGTTGGCTGGAGACACCTATTTAAGGGGATTC	95449120	95449315
chr9	WDR5	134154476	+	GACCTCACTCAGATGTCGC	CAGTACTCACTTGTCCAGCG	CGCTGGACAAGTGAGTACTG	tggCCGACCTCACTCAGATGTCGCACGTGGGGGATGGGGAGCGGGTCCCACCTCCTGTCCCTGCCTGGCTGTCAGCGCCCGCCGTGTGTCACCTGTCCGTTTTTATTGCAGATGACGACAA[C]CCCCCCGTGTCTTTTGTGAAGTTCTCCCCGAACGGCAAATACATCCTGGCCGCCACGCTGGACAAGTGAGTACTGCGTGGGACTGTGGGGGCGGGCATGTGGCCTCCCCAGCCAGAGAC	ACGTGGGGGATGGGGAGCGGGTCCCACCTCCTGTCCCTGCCTGGCTGTCAGCGCCCGCCGTGTGTCACCTGTCCGTTTTTATTGCAGATGACGACAA[C]CCCCCCGTGTCTTTTGTGAAGTTCTCCCCGAACGGCAAATACATCCTGGCCGCCA	134154360	134154551	GACCTCACTCAGATGTCGCACGTGGGGGATGGGGAGCGGGTCCCACCTCCTGTCCCTGCCTGGCTGTCAGCGCCCGCCGTGTGTCACCTGTCCGTTTTTATTGCAGATGACGACAACCCCCCCGTGTCTTTTGTGAAGTTCTCCCCGAACGGCAAATACATCCTGGCCGCCACGCTGGACAAGTGAGTACTG	134154379	134154531
chrX	AMER1	64191430	+	GGCCTCATCTGATACTCTAAGAC	CTATACTCGAGAGGCTTATGGC	GCCATAAGCCTCTCGAGTATAG	CTAAGGGCCTCATCTGATACTCTAAGACGGGCTTCTCCTGCCGGGCCTGGGTCTCTCGGACTTGAGTCTCTCTACAACGAACCTCTCGGGCCTGGGCTTCTCGGGTTCTGGCCTCCCTGCC[A]TGAGCTTCCCAAGTGTGGGCCTCCCTGGCATAGGCTTCCCTGCCATAAGCCTCTCGAGTATAGGCCTCCCTGGCGTGGGCCTCCCTGGCATGAGCTTCTCGGGCACGTGCCTCCTGGGC	GGGCTTCTCCTGCCGGGCCTGGGTCTCTCGGACTTGAGTCTCTCTACAACGAACCTCTCGGGCCTGGGCTTCTCGGGTTCTGGCCTCCCTGCC[A]TGAGCTTCCCAAGTGTGGGCCTCCCTGGCATAGGCTTCCCT	64191314	64191493	GGCCTCATCTGATACTCTAAGACGGGCTTCTCCTGCCGGGCCTGGGTCTCTCGGACTTGAGTCTCTCTACAACGAACCTCTCGGGCCTGGGCTTCTCGGGTTCTGGCCTCCCTGCCATGAGCTTCCCAAGTGTGGGCCTCCCTGGCATAGGCTTCCCTGCCATAAGCCTCTCGAGTATAG	64191337	64191471
chrX	AMER1	64191850	+	CTGGCTCATAGAACTCATATAGGG	AGTTAGGTCTTATCCTGGCCTAG	CTAGGCCAGGATAAGACCTAACT	GTGGAGAGTTCTCAAGGCTGTCATCTGGCTCATAGAACTCATATAGGGCATCTCCACTGTAGCTGTCTCGGGGTAGACAATCCCTGCGGACAAGCCCCAGGGCCTCACCTGAATCATCCTC[A]AATCCAGGTGTGGTGGAGTCATAATAACCTTCATCACTATTGGGGGCGGATTCTTGCTGGTCACTCTGAGGAGTCAAAAGTTCCCCAGGGGCTAGGCCAGGATAAGACCTAACTGGGTC	CATCTCCACTGTAGCTGTCTCGGGGTAGACAATCCCTGCGGACAAGCCCCAGGGCCTCACCTGAATCATCCTC[A]AATCCAGGTGTGGTGGAGTCATAATAACCTTCATCACTATTGGGGGCGGATTCTTGCTGGTCACTCTGAGGAGTCAAAAGTTCCCCAGGGG	64191753	64191964	CTGGCTCATAGAACTCATATAGGGCATCTCCACTGTAGCTGTCTCGGGGTAGACAATCCCTGCGGACAAGCCCCAGGGCCTCACCTGAATCATCCTCAAATCCAGGTGTGGTGGAGTCATAATAACCTTCATCACTATTGGGGGCGGATTCTTGCTGGTCACTCTGAGGAGTCAAAAGTTCCCCAGGGGCTAGGCCAGGATAAGACCTAACT	64191777	64191941
chrX	AMER1	64192170	+	GCAGTTTCCCACAGATATTCTAAG	AGAACAGGACATGGACAGTATG	CATACTGTCCATGTCCTGTTCT	GCAGTTTCCCACAGATATTCTAAGtcatcatcttcttcctcctccttaacctcctcttcttcctcctctaattccacctcttcttcctcttcttcctcctcgtcatcatcatctggcaagg[c]catctcctccccacctcctTGGTAGGTCACCAGGCAGGAACTTCGCTTGGTCCCATCTCGGTTTGCTCTCTGGCCCCCAGAGGCCATGCTGTCTGTCATACTGTCCATGTCCTGTTCTG	tcatcatcttcttcctcctccttaacctcctcttcttcctcctctaattccacctcttcttcctcttcttcctcctcgtcatcatcatctggcaagg[c]catctcctccccacctcctTGGTAGGTCACCAGGCAGGAACTTCGCTTGGTCCCATCTCGGTTTGCTCTCTGGCCCCCAGAGGCCATGCTGTCTGT	64192049	64192288	GCAGTTTCCCACAGATATTCTAAGTCATCATCTTCTTCCTCCTCCTTAACCTCCTCTTCTTCCTCCTCTAATTCCACCTCTTCTTCCTCTTCTTCCTCCTCGTCATCATCATCTGGCAAGGCCATCTCCTCCCCACCTCCTTGGTAGGTCACCAGGCAGGAACTTCGCTTGGTCCCATCTCGGTTTGCTCTCTGGCCCCCAGAGGCCATGCTGTCTGTCATACTGTCCATGTCCTGTTCT	64192073	64192266
chrX	AMER1	64192870	+	CTTTCTTTGGCTTGGGCATAG	GAAGATGTTGTCAGTGAAGGAAC	GTTCCTTCACTGACAACATCTTC	GGTGACGGCGGATACTGCTAAAAAAGCCTTTTAGGCCTTTCTTTGGCTTGGGCATAGAGGGAAACTTCTCAGCCACAGCTTTCTCTGTGGCTCCAGCCACAGATGTCTTACATCTGGAGCC[T]GTCTCCAAAGCCCCATGGGCACTCTGAGAGCTGGGAAATTGGCAGGGTAACTCAGGCAAAGGCAGGGAGAAGCCAGTTCCTTCACTGACAACATCTTCAGGGCCATGGGCTGCTTCACT	AGGGAAACTTCTCAGCCACAGCTTTCTCTGTGGCTCCAGCCACAGATGTCTTACATCTGGAGCC[T]GTCTCCAAAGCCCCATGGGCACTCTGAGAGCTGGGAAATTGGCAGGGTAACTCAGGCAAAGGCAGGGAGAAGCCA	64192785	64192968	CTTTCTTTGGCTTGGGCATAGAGGGAAACTTCTCAGCCACAGCTTTCTCTGTGGCTCCAGCCACAGATGTCTTACATCTGGAGCCTGTCTCCAAAGCCCCATGGGCACTCTGAGAGCTGGGAAATTGGCAGGGTAACTCAGGCAAAGGCAGGGAGAAGCCAGTTCCTTCACTGACAACATCTTC	64192806	64192945
chrX	ATRX	77681920	+	TCCCTCAATTCTATTCTTTTCAGTC	TGTGACTCTTCAGAGGATAAAAAG	CTTTTTATCCTCTGAAGAGTCACA	AGCCACTTTGTATTTCCTTAGTATTTCTCTTTGAACTTAAATTTCTTCTTTCCCTCAATTCTATTCTTTTCAGTCTCTTATCAGAAGAGTTACAACCATCTTCTTTCATGGAATATTTCTC[A]GTATCAGATGATGAACAATCTTGTCTCTTCCTTGAACTCTTTCCAAGCAACTTGCACCTTTTCTTCTCTCTACCATATGCTCCATTCTTACTCTTTTTATCCTCTGAAGAGTCACAACT	TCTTATCAGAAGAGTTACAACCATCTTCTTTCATGGAATATTTCTC[A]GTATCAGATGATGAACAATCTTGTCTCTTCCTTGAACTCTTTCCAAGCAACTTGCACCTTTTCTTCTCTCTACCATATGCTCCATTCTTACT	77681849	77682036	TCCCTCAATTCTATTCTTTTCAGTCTCTTATCAGAAGAGTTACAACCATCTTCTTTCATGGAATATTTCTCAGTATCAGATGATGAACAATCTTGTCTCTTCCTTGAACTCTTTCCAAGCAACTTGCACCTTTTCTTCTCTCTACCATATGCTCCATTCTTACTCTTTTTATCCTCTGAAGAGTCACA	77681874	77682012
chrX	ATRX	77682805	+	GTGTTTCTCATCTTCAGAAGAGTC	TAAAAAGGGCAAATCAGCTAAGAG	CTCTTAGCTGATTTGCCCTTTTTA	TTTTGCTGTGTTTCTCATCTTCAGAAGAGTCAAAATCTTTTGTATTTGGAATTCTTTTTTTGGTGGTTCTGGcagcaccaattttactcatgctctttatctctttttctaattctgagtc[a]taattagaagactcagactGGGTTTGTCGTTTCTTTTTAGAAATTATAGAGCTCTTAGCTGATTTGCCCTTTTTAGTATCAAAATCTGAGCCAGATGTAGAActttttcgtttcctttt	AAAATCTTTTGTATTTGGAATTCTTTTTTTGGTGGTTCTGGcagcaccaattttactcatgctctttatctctttttctaattctgagtc[a]taattagaagactcagactGGGTTTGTCGTTTCTTTTTAGAAATTATAGAG	77682691	77682880	GTGTTTCTCATCTTCAGAAGAGTCAAAATCTTTTGTATTTGGAATTCTTTTTTTGGTGGTTCTGGCAGCACCAATTTTACTCATGCTCTTTATCTCTTTTTCTAATTCTGAGTCATAATTAGAAGACTCAGACTGGGTTTGTCGTTTCTTTTTAGAAATTATAGAGCTCTTAGCTGATTTGCCCTTTTTA	77682715	77682856
chrX	BCORL	130056036	+	ACTTTGAAATCACCACCATGC	AACTGTTGCAAGACTGGAATTC	GAATTCCAGTCTTGCAACAGTT	TTTCAGGCCCGGTTCCCGCACTTTGAAATCACCACCATGCCCAAGGCCGAGTTCTACAGGCAGGTGGCCTCCAGTCAGCTGCTGACCCCTGCCGAGAGGCCTGGAGGCTTGGACGACAGAT[C]CCCCCCAGGCTCCTCTGAGACTGTGGAGCTGGTGCGGTACGAGCCAGACCTACTTCGGCTCCTAGGGTCCGAGGTGGAATTCCAGTCTTGCAACAGTTGACCGGGAAAACAGCCCCTCC	CCAAGGCCGAGTTCTACAGGCAGGTGGCCTCCAGTCAGCTGCTGACCCCTGCCGAGAGGCCTGGAGGCTTGGACGACAGAT[C]CCCCCCAGGCTCCTCTGAGACTGTGGAGCTGGTGCGGTACGAGCCAGACCTACTTCGGCTCCTAGGGTCCGAGGTG	130055934	130056134	ACTTTGAAATCACCACCATGCCCAAGGCCGAGTTCTACAGGCAGGTGGCCTCCAGTCAGCTGCTGACCCCTGCCGAGAGGCCTGGAGGCTTGGACGACAGATCCCCCCCAGGCTCCTCTGAGACTGTGGAGCTGGTGCGGTACGAGCCAGACCTACTTCGGCTCCTAGGGTCCGAGGTGGAATTCCAGTCTTGCAACAGTT	130055955	130056112

## Sheet: Sheet1
seq_015	CACCACAGCTAGAACTTATCAAAC	CTTTTTGTCTCTGGTCCTTACTTC	9	33676160	33676368	CACCACAGCTAGAACTTATCAAACCCTTTTGTGAAGATCTTGACCAATGGCTAAGTGAAGATGACAATCATGTTGCAGCAATTCACTGTAAAGCTGGAAAGGGACGAACTGGTATAATGATTTATGCATATTTATTACATCGGGGCAAATTTTTAAAGGCACAAGAGGCCCTAGATTTCTATGGGGAAGTAAGGACCAGAGACAAAAAG	33676184	33676344
seq_017	ATACATTCTTCATACCAGGACCAG	AATTTGGAGAAAAGTATCGGTTGG	9	33675631	33675825	ATACATTCTTCATACCAGGACCAGAGGAAACCTCAGAAAAAGTAGAAAATGGAAGTCTATGTGATCAAGAAATTGATAGCATTTGCAGTATAGAGCGTGCAGATAATGACAAGGAGTATCTAGTACTTACTTTAACAAAAAATGATCTTGACAAAGCAAATAAAGACAAAGCCAACCGATACTTTTCTCCAAATT	33675655	33675801
